# Supplementary material for: Aluminum-copper alloy anode materials for high-energy aqueous aluminum batteries
Source: PubMed Central journal article supplement (PMC8803968; doi:10.1038/s41467-022-28238-3), 2022-01-31
Supplement: 41467_2022_28238_MOESM1_ESM.pdf [file 41467_2022_28238_MOESM1_ESM.pdf]

## **Supplementary Information**

*for*

### **Aluminum-copper alloy anode materials for high-energy aqueous aluminum batteries**

Ran et al

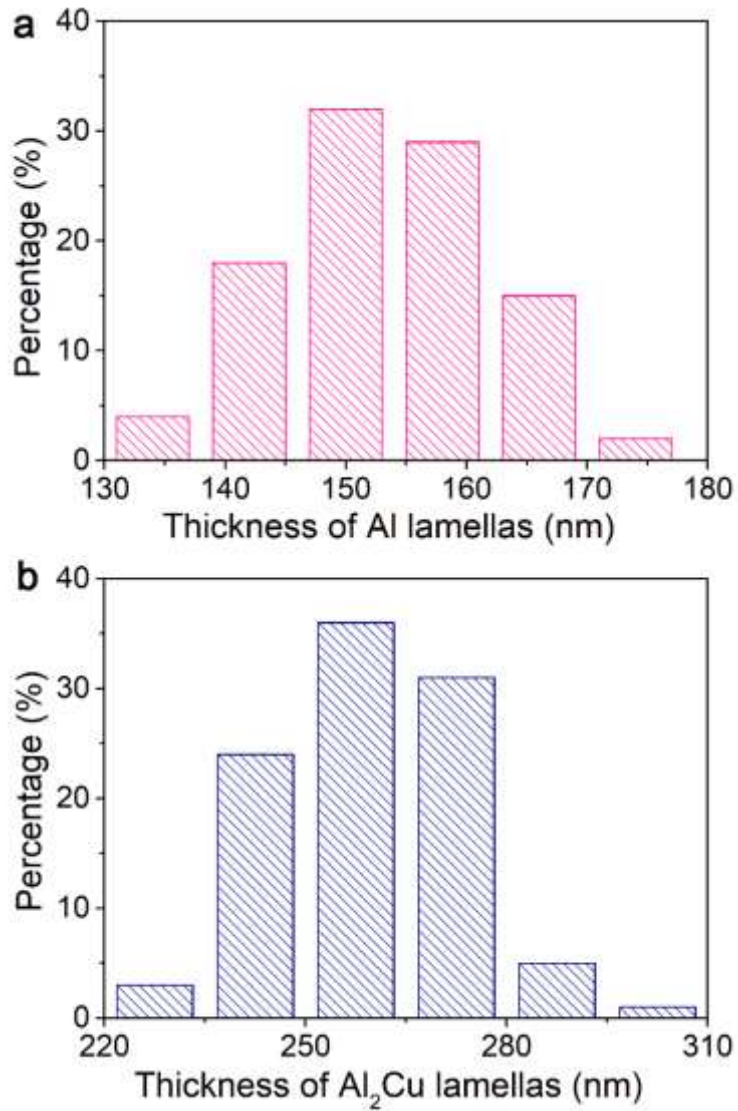

**Supplementary Figure 1. Size distributions of Al and  $Al_2Cu$  lamellas in the E- $Al_{82}Cu_{18}$  alloy. a, Thickness of metallic  $\alpha$ -Al lamellas. b, Thickness of intermetallic  $Al_2Cu$  lamellas.**

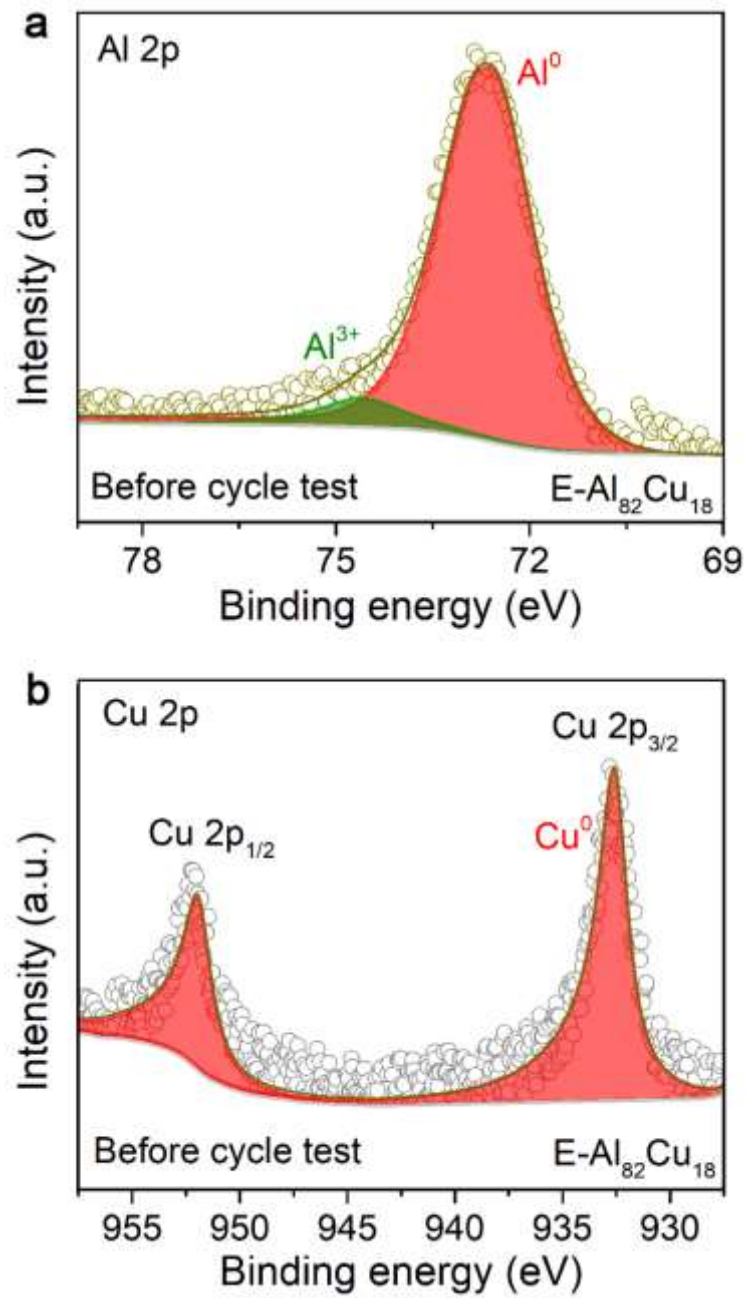

**Supplementary Figure 2. XPS analysis of as-prepared E-Al<sub>82</sub>Cu<sub>18</sub> alloy sheets. a,**  
**b,** High-resolution XPS spectra of Al 2p (a) and Cu 2p (b) in as-prepared E-Al<sub>82</sub>Cu<sub>18</sub>  
 alloy.

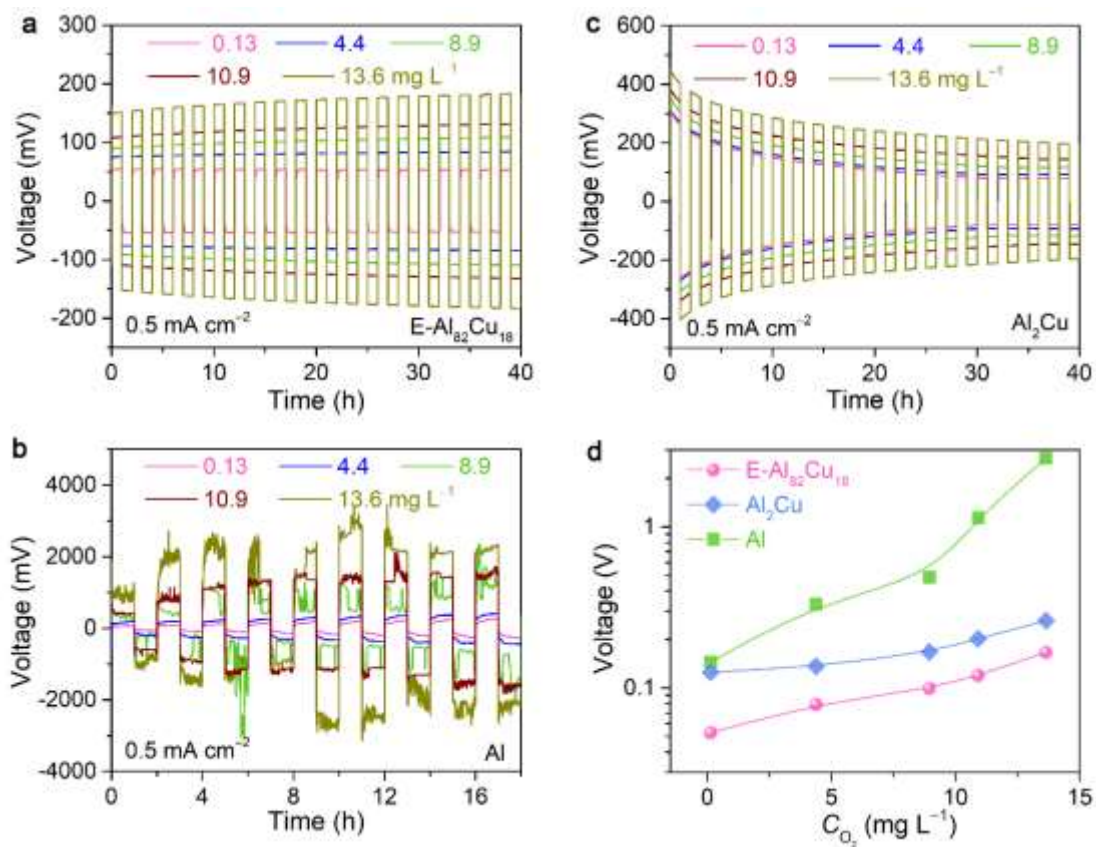

**Supplementary Figure 3. Stripping/plating behaviors of Al-based symmetric cells in aqueous electrolytes with different  $O_2$  concentrations. a-c,** The stripping/plating behaviors of symmetric cells based on identical  $E-Al_{82}Cu_{18}$  (a), Al (b) and  $Al_2Cu$  (c) electrodes, respectively, in 2 M  $Al(OTf)_3$  aqueous electrolytes with  $O_2$  concentrations of 0.13, 4.4, 8.9, 10.9,  $13.6 \text{ mg L}^{-1}$ . **d,** Hysteresis voltages of  $E-Al_{82}Cu_{18}$ ,  $Al_2Cu$  and Al symmetric cells as a function of  $O_2$  concentrations ( $C_{O_2}$ ).

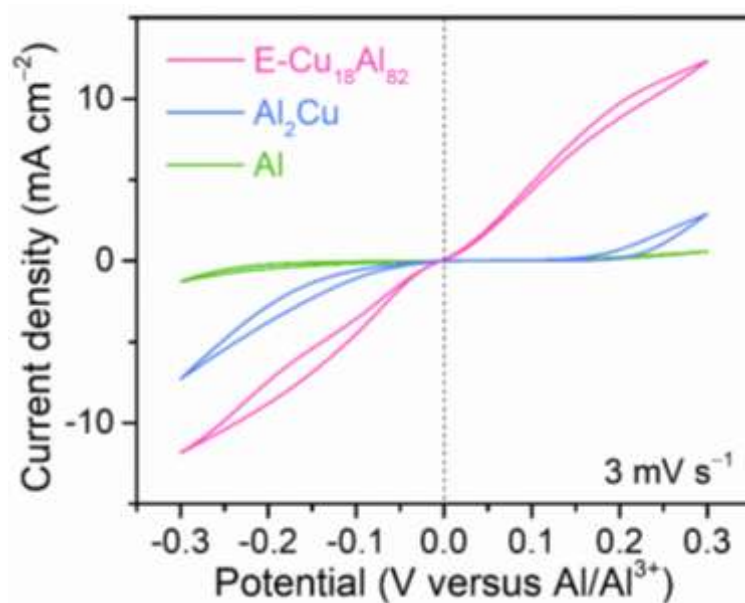

**Supplementary Figure 4. Cyclic voltammogram of Al stripping/plating in three-electrode configuration cell, with E-Al<sub>82</sub>Cu<sub>18</sub>, Al<sub>2</sub>Cu and Al sheets as the working and counter electrodes and Al wire as the reference electrode. The 1<sup>st</sup> CV curves of E-Al<sub>82</sub>Cu<sub>18</sub>, Al<sub>2</sub>Cu and Al sheets during the Al stripping and plating. Electrolyte: in 2 M Al(OTF)<sub>3</sub> aqueous electrolytes with  $C_{O_2} = 0.13 \text{ mg L}^{-1}$ . Scan rate:  $3 \text{ mV s}^{-1}$ .**

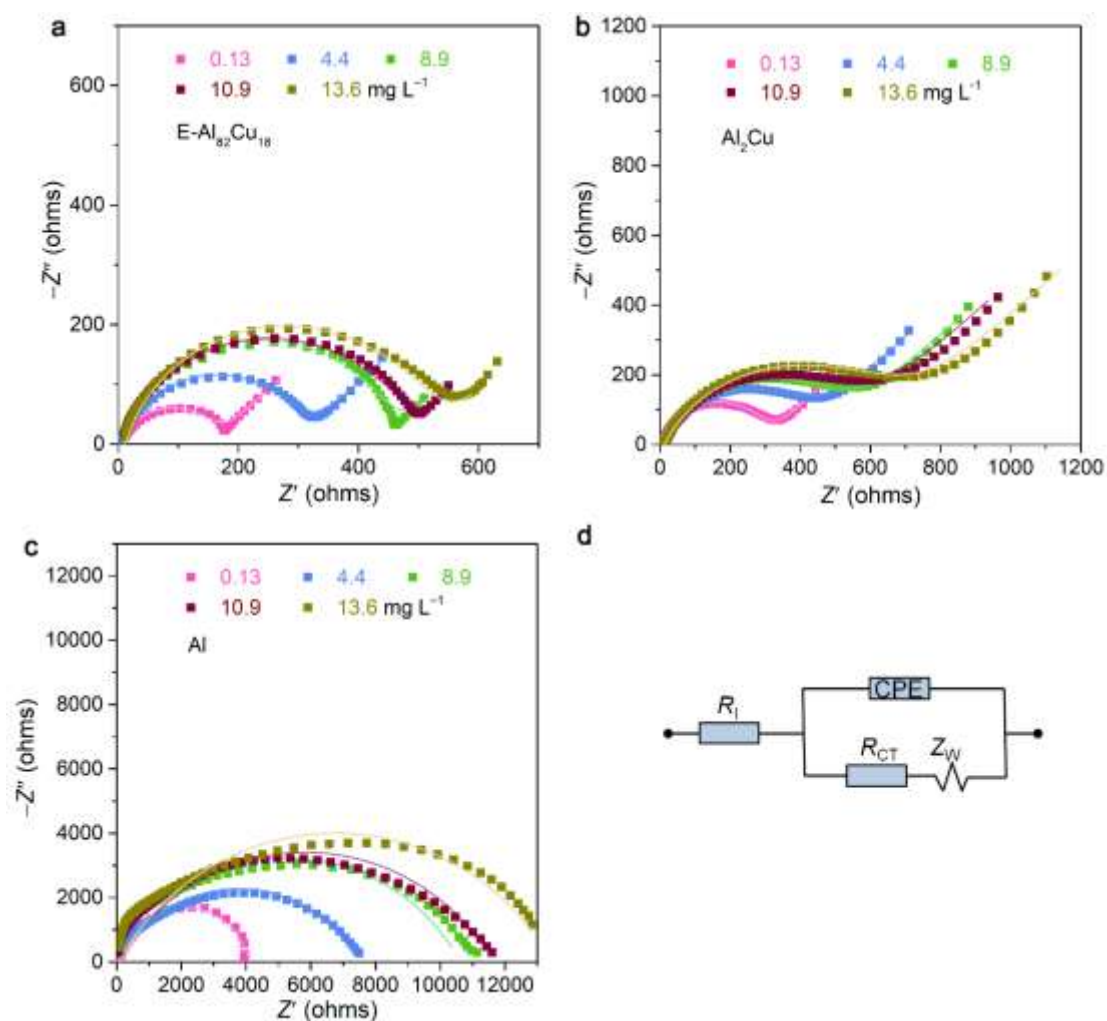

**Supplementary Figure 5. EIS spectra of Al-based symmetric cells in aqueous electrolytes with different  $\text{O}_2$  concentrations.** a-c, The EIS spectra of as-assembled symmetric cells based on identical E- $\text{Al}_{82}\text{Cu}_{18}$  (a),  $\text{Al}_2\text{Cu}$  (b) and Al (c) electrodes, in 2 M  $\text{Al}(\text{OTF})_3$  aqueous electrolytes with  $\text{O}_2$  concentrations of 0.13, 4.4, 8.9, 10.9, 13.6  $\text{mg L}^{-1}$ . The square symbols in pink, blue, green, brown, dark yellow indicate the raw data for E- $\text{Al}_{82}\text{Cu}_{18}$  (a),  $\text{Al}_2\text{Cu}$  (b) and Al (c) symmetric cells in 0.13, 4.4, 8.9, 10.9, 13.6  $\text{mg L}^{-1}$ , respectively, where the lines are their corresponding fit data. d, The equivalent circuit with the general descriptors: the intrinsic resistance of both electrolyte and electrode ( $R_i$ ), the charge transfer resistance ( $R_{CT}$ ), the constant phase element (CPE) and the slope of the inclined line at flow frequencies corresponding to the Warburg resistance ( $Z_w$ ).

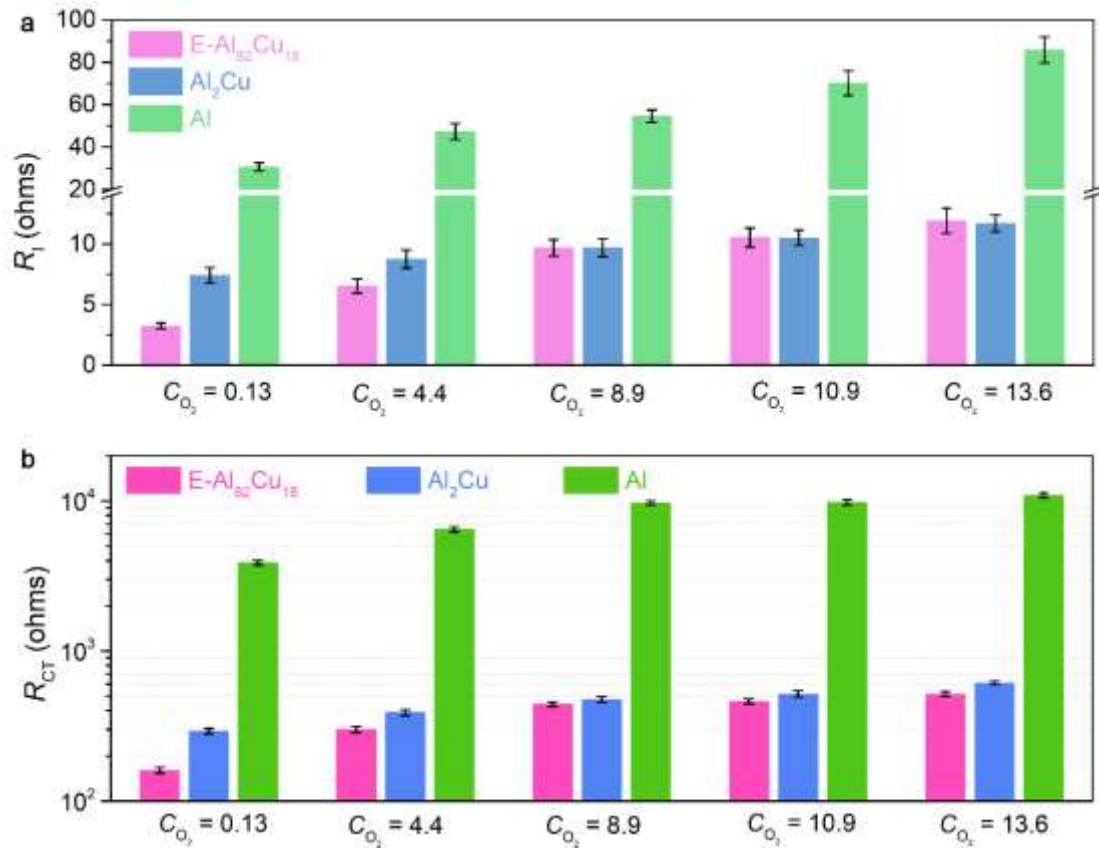

**Supplementary Figure 6. Comparison of  $R_{CT}$  and  $R_1$  values of symmetric cells in aqueous electrolytes with different  $O_2$  concentrations. a,** The  $R_1$  values of E-Al<sub>82</sub>Cu<sub>18</sub>, Al<sub>2</sub>Cu and Al electrodes based on symmetric cells in 2 M Al(OTF)<sub>3</sub> aqueous electrolytes with  $O_2$  concentrations of 0.13, 4.4, 8.9, 10.9, 13.6 mg L<sup>-1</sup>. **b,** The  $R_{CT}$  values of E-Al<sub>82</sub>Cu<sub>18</sub>, Al<sub>2</sub>Cu and Al electrodes based on symmetric cells in 2 M Al(OTF)<sub>3</sub> aqueous electrolytes with  $O_2$  concentrations of 0.13, 4.4, 8.9, 10.9, 13.6 mg L<sup>-1</sup>. The values of  $R_1$  and  $R_{CT}$  for symmetric cells of E-Al<sub>82</sub>Cu<sub>18</sub>, Al<sub>2</sub>Cu and Al electrodes are listed in Supplementary Table 3.

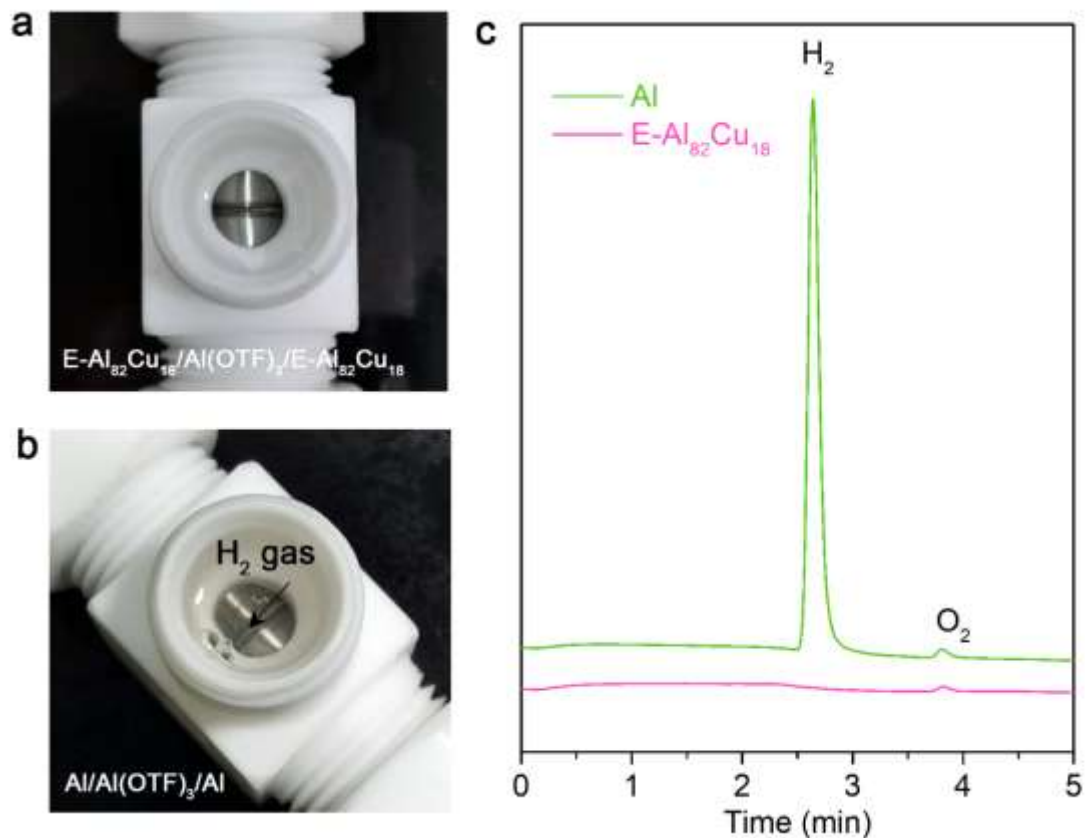

**Supplementary Figure 7. Photograph images for symmetric cells constructed with  $E\text{-Al}_{82}\text{Cu}_{18}$  and Al sheets, respectively, in Swagelok-type cells. a,** Representative optical image of symmetric cell of  $E\text{-Al}_{82}\text{Cu}_{18}$  during Al stripping/plating at  $1 \text{ mA cm}^{-2}$ , where there does not observe any bubbles. **b,** Representative optical image of symmetric cell of monometallic Al during Al stripping/plating at  $1 \text{ mA cm}^{-2}$ , where there generate obvious bubbles. **c,** Elution profiles of  $\text{H}_2$  gases during the Al stripping/plating of monometallic Al and  $E\text{-Al}_{82}\text{Cu}_{18}$  electrodes. Here the trace  $\text{O}_2$  is probably due to the residual  $\text{O}_2$  in the reactor.



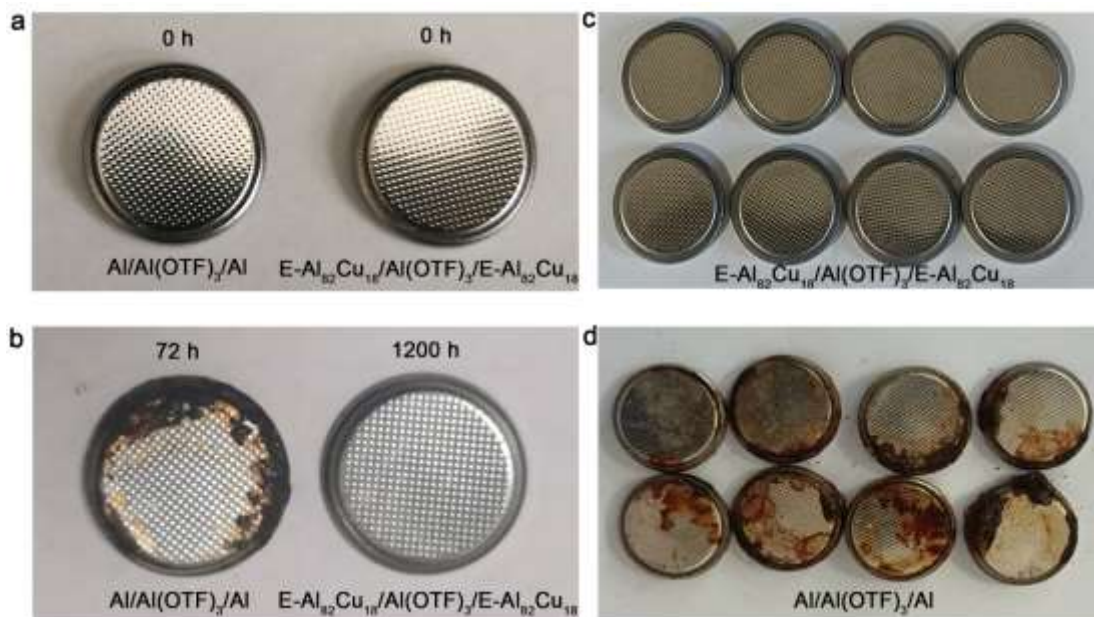

**Supplementary Figure 8. Comparison of symmetric cells based on identical E-Al<sub>82</sub>Cu<sub>18</sub> and Al electrodes before and after Al stripping/plating cycles in 2 M Al(OTF)<sub>3</sub> aqueous electrolyte with O<sub>2</sub> concentration of 0.13 mg L<sup>-1</sup>. **a**, Optical photograph of E-Al<sub>82</sub>Cu<sub>18</sub> (right) and Al (left) symmetric cells before Al stripping/plating cycles. **b**, Optical photograph of E-Al<sub>82</sub>Cu<sub>18</sub> (right) and Al (left) symmetric cells before and after Al stripping/plating cycle measurements for 1200 h and 72 h, respectively. **c**, **d**, Optical photographs for many E-Al<sub>82</sub>Cu<sub>18</sub> (**c**) and Al (**d**) symmetric cells after Al stripping/plating cycles.**

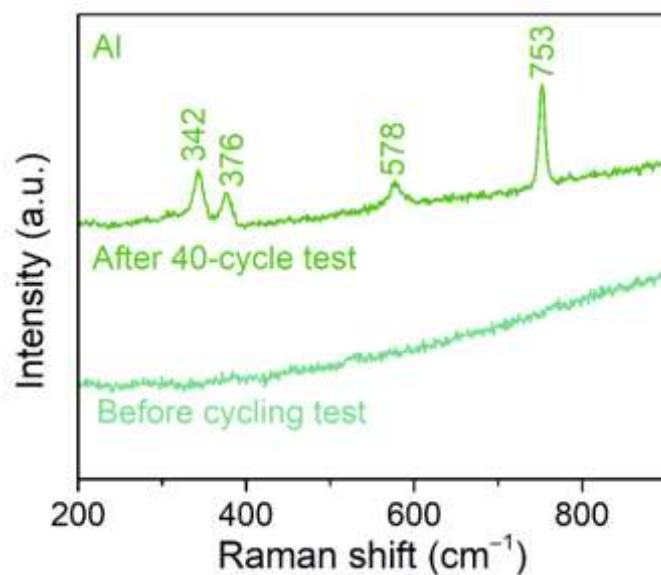

**Supplementary Figure 9. Raman spectroscopy characterization of Al electrodes.**

Raman spectra of monometallic Al electrodes before and after Al stripping/plating cycles based on the Al symmetric cells in 2 M Al(OTF)<sub>3</sub> aqueous electrolyte with O<sub>2</sub> concentration of 0.13 mg L<sup>-1</sup>. Here Raman bands at 376, 578, 753 cm<sup>-1</sup> can be attributed to the *E<sub>g</sub>* symmetric vibration mode of Al<sub>2</sub>O<sub>3</sub>. There does not observe the characteristic band corresponding to *A<sub>1g</sub>* symmetric vibration mode due to the amorphous feature of Al<sub>2</sub>O<sub>3</sub>. The characteristic band at 342 cm<sup>-1</sup> can be ascribed to the vibration of the Al-O bond in the presence of OH<sup>-</sup>. The increase in intensity of Raman bands implies that there produces additional Al<sub>2</sub>O<sub>3</sub> on monometallic Al electrode after Al stripping/plating cycles.

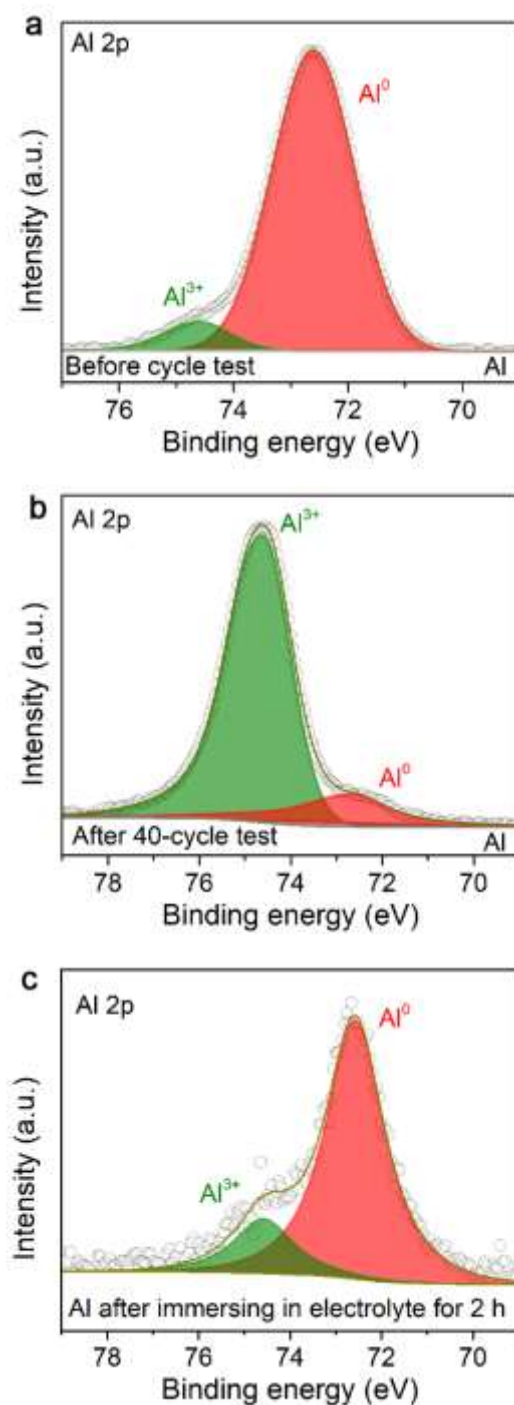

**Supplementary Figure 10. Surface chemical states of Al electrodes before and after Al stripping/plating cycles in Al symmetric cells. a, b, Al 2p XPS spectra of monometallic Al electrode (a) before and (b) after 40 Al stripping/plating cycles in 2 M  $\text{Al}(\text{OTF})_3$  aqueous electrolyte with  $\text{O}_2$  concentration of  $0.13 \text{ mg L}^{-1}$ . c, Al 2p XPS spectra of monometallic Al electrode after immersed in 2 M  $\text{Al}(\text{OTF})_3$  aqueous electrolyte for 2 h.**

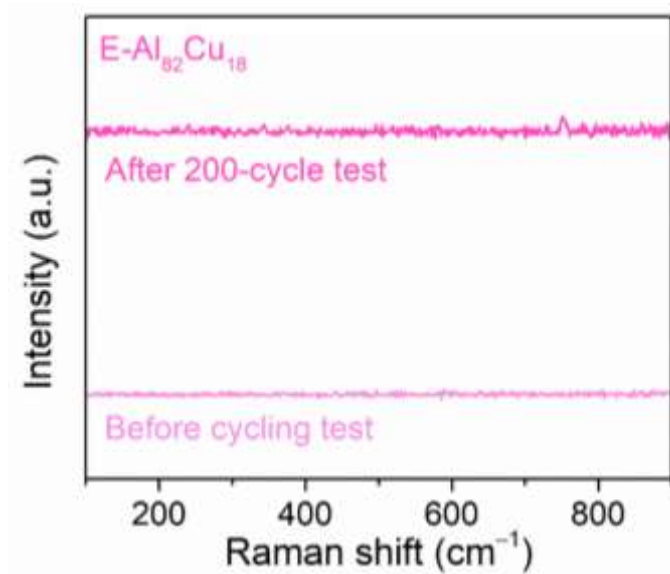

**Supplementary Figure 11. Raman spectroscopy characterization of E-Al<sub>82</sub>Cu<sub>18</sub> electrodes.** Raman spectra of E-Al<sub>82</sub>Cu<sub>18</sub> electrodes before and after Al stripping/plating for 200 cycles based on the E-Al<sub>82</sub>Cu<sub>18</sub> symmetric cells in 2 M Al(OTF)<sub>3</sub> aqueous electrolyte with O<sub>2</sub> concentration of 0.13 mg L<sup>-1</sup>.

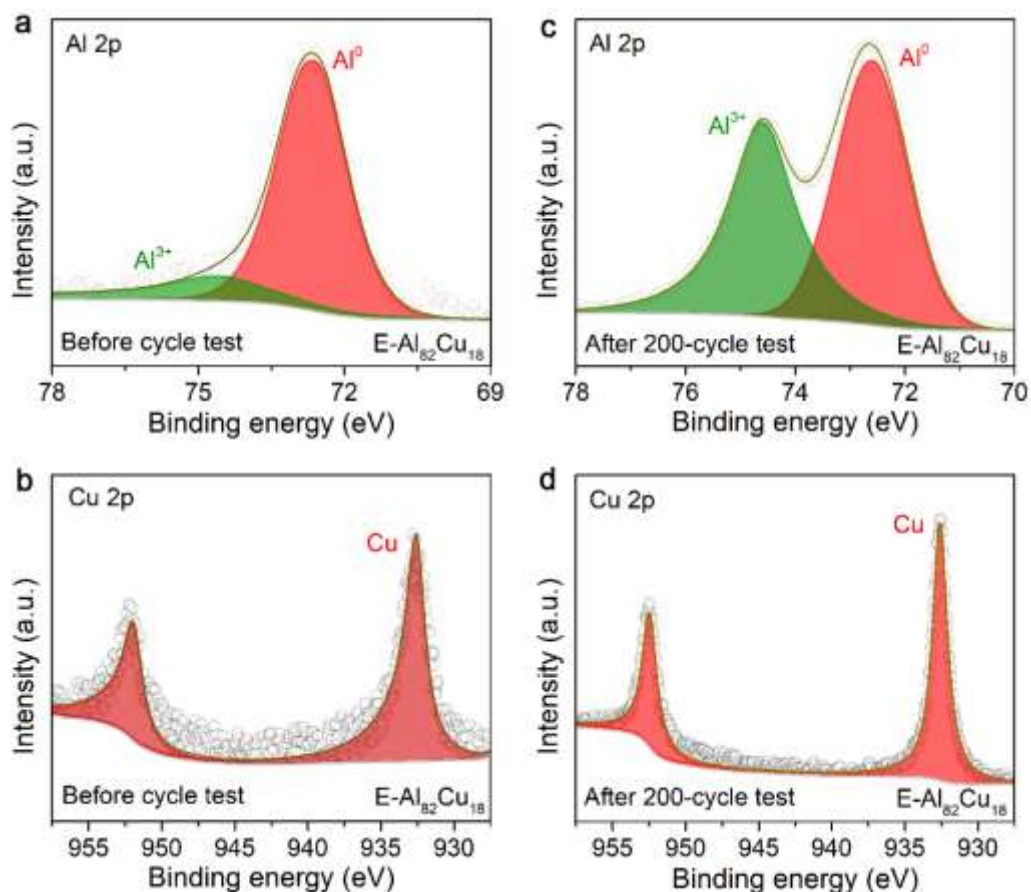

**Supplementary Figure 12. Surface chemical states of Al and Cu in E-Al<sub>82</sub>Cu<sub>18</sub> electrodes before and after Al stripping/plating cycles based on symmetric cells. a, b, Al 2p XPS spectra of Al in E-Al<sub>82</sub>Cu<sub>18</sub> electrode (a) before and (b) after 200 Al stripping/plating cycles based on E-Al<sub>82</sub>Cu<sub>18</sub> symmetric cells. c, d, Cu 2p XPS spectra of Cu in E-Al<sub>82</sub>Cu<sub>18</sub> electrode (c) before and (d) after 200 Al stripping/plating cycles based on E-Al<sub>82</sub>Cu<sub>18</sub> symmetric cells. Electrolyte: 2 M Al(OTF)<sub>3</sub> aqueous electrolyte, with O<sub>2</sub> concentration of 0.13 mg L<sup>-1</sup>.**

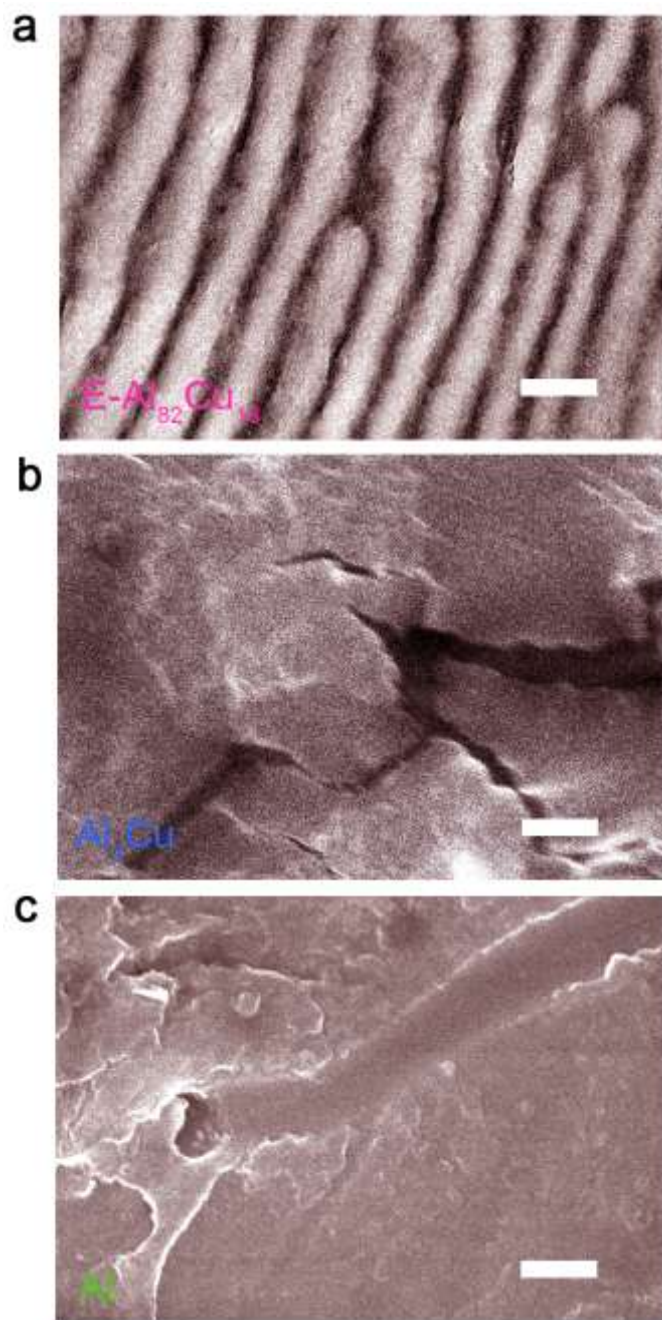

**Supplementary Figure 13. SEM backscattered electron image of Al-based electrodes after Al stripping/plating cycling based on their symmetric cells in 2 M  $\text{Al}(\text{OTF})_3$  aqueous electrolyte with  $C_{\text{O}_2} = 0.13 \text{ mg L}^{-1}$ .** **a**, SEM image of  $\text{E-Al}_{82}\text{Cu}_{18}$  electrodes after the Al stripping/plating for 2000 h. Scale bars, 500 nm. **b**, SEM image of  $\text{Al}_2\text{Cu}$  electrodes after the Al stripping/plating for 250 h. Scale bar, 500 nm. **c**, SEM image of monometallic Al electrodes after the Al stripping/plating for 40 h. Scale bar, 500 nm.



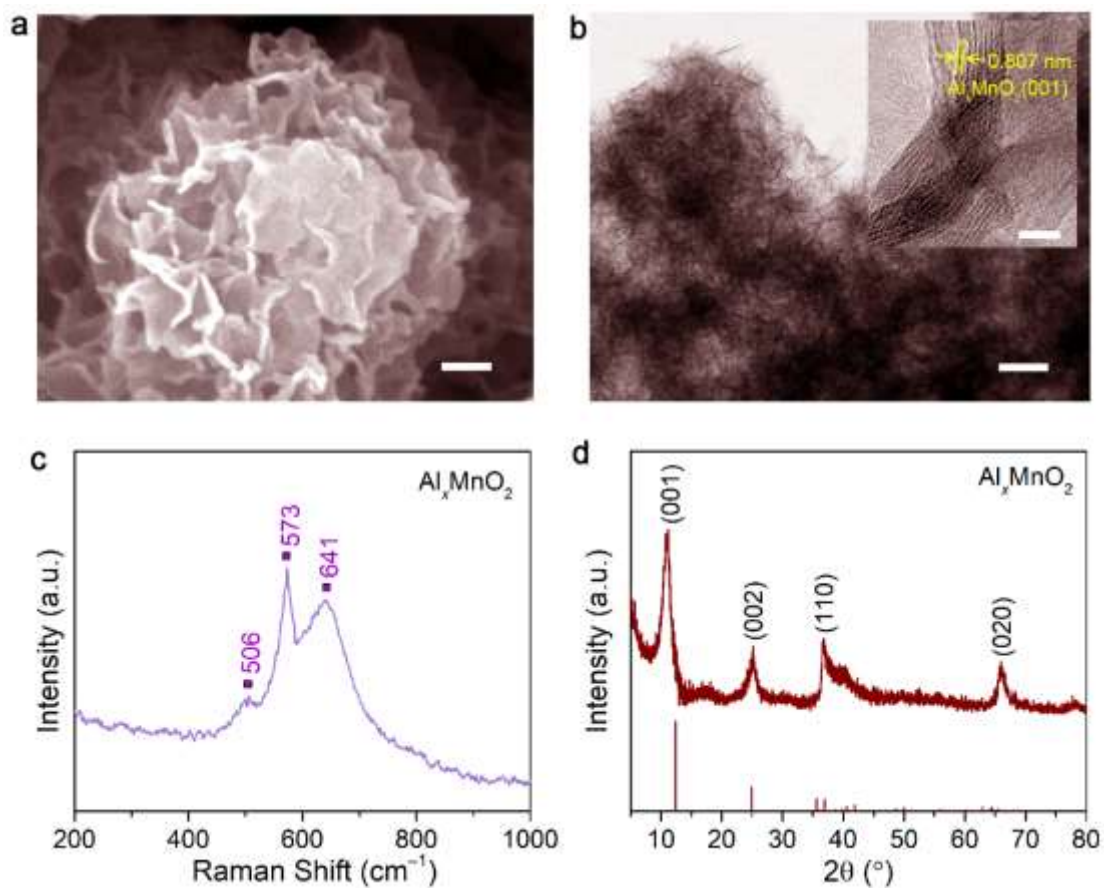

**Supplementary Figure 14. Structure characterizations of  $\text{Al}_x\text{MnO}_2$  nanosheets.** **a**, Representative SEM image of  $\text{Al}_x\text{MnO}_2$  nanosheets. Scale bar, 100 nm. **b**, Low-magnification TEM image of  $\text{Al}_x\text{MnO}_2$  nanosheets. Scale bar, 100 nm. Inset: HRTEM image of  $\text{Al}_x\text{MnO}_2$  nanosheets. Scale bar, 5 nm. **c**, Raman spectrum of as-prepared  $\text{Al}_x\text{MnO}_2$  nanosheets. **d**, XRD patterns of as-prepared  $\text{Al}_x\text{MnO}_2$  nanosheets. The line patterns show reference card 43-1456 for layered crystalline birnessite according to JCPDS.

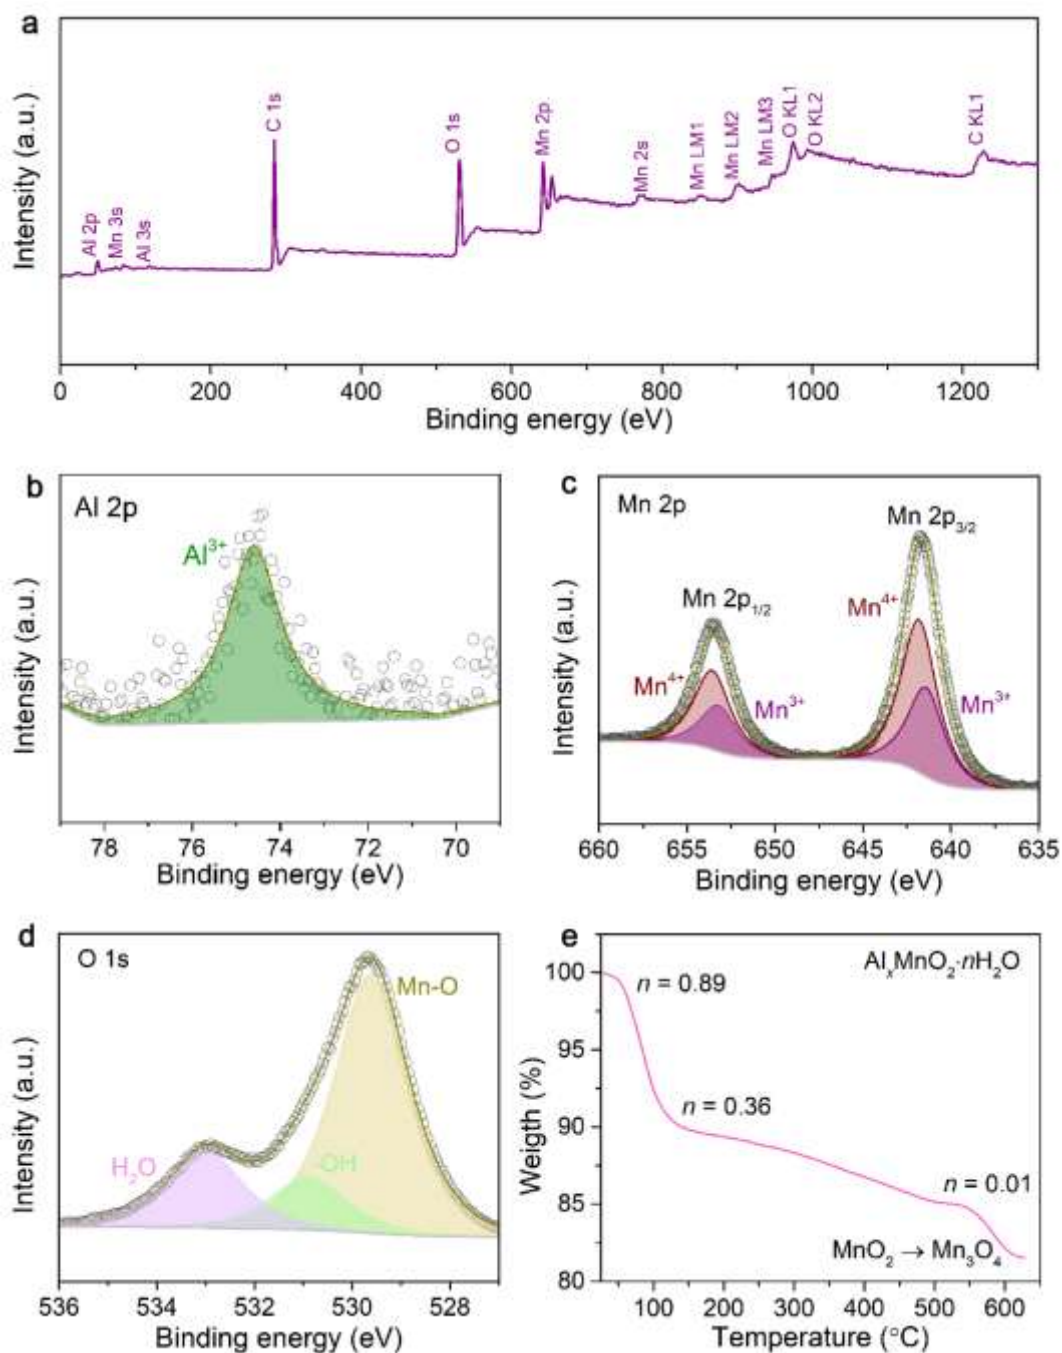

**Supplementary Figure 15. XPS and TGA characterization of  $\text{Al}_x\text{MnO}_2 \cdot n\text{H}_2\text{O}$  nanosheets.** **a**, XPS survey spectrum of  $\text{Al}_x\text{MnO}_2$ . **b**, **c**, **d**, Al 2p (**b**) Mn 2p (**c**) and O 1s (**d**) XPS spectra of as-prepared  $\text{Al}_x\text{MnO}_2$ . **e**, TGA measurement reveals that  $\sim 0.89$  mol of water exists in per mole of  $\text{Al}_x\text{MnO}_2 \cdot n\text{H}_2\text{O}$  at room temperature. The weight evolution is characterized by a steep loss between room temperature and  $110^\circ\text{C}$  (removing crystal water, to  $\text{Al}_x\text{MnO}_2 \cdot 0.36\text{H}_2\text{O}$ ), followed by a weight loss up to  $530^\circ\text{C}$  (removing structure water, to  $\text{Al}_x\text{MnO}_2 \cdot 0.01\text{H}_2\text{O}$ ).



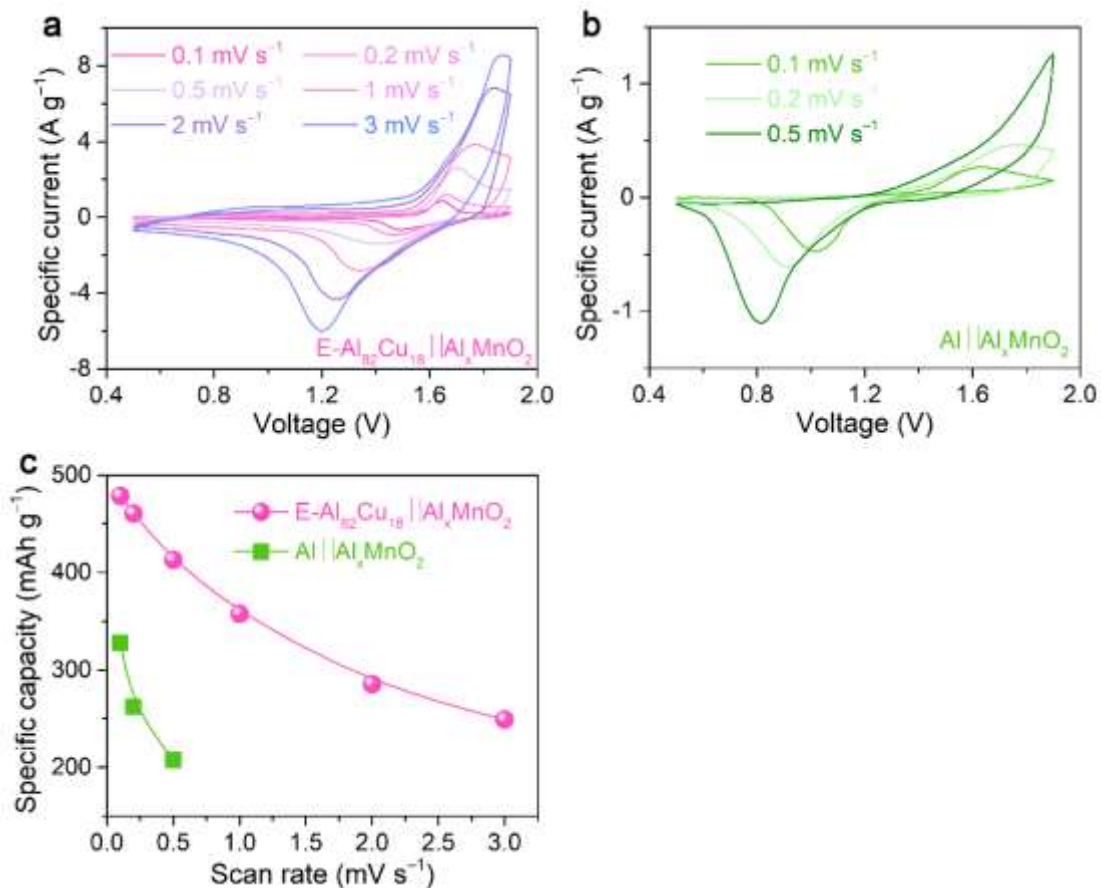

**Supplementary Figure 16. Cyclic voltammetry behaviors of E- $\text{Al}_{82}\text{Cu}_{18}||\text{Al}_x\text{MnO}_2$  and Al|| $\text{Al}_x\text{MnO}_2$  cells. a**, Typical CV curves of E- $\text{Al}_{82}\text{Cu}_{18}||\text{Al}_x\text{MnO}_2$  cell at various scan rates from 0.1 to 3  $\text{mV s}^{-1}$ . **b**, Typical CV curves of Al|| $\text{Al}_x\text{MnO}_2$  cell at various scan rates from 0.1 to 0.5  $\text{mV s}^{-1}$ . **c**, Specific capacities for E- $\text{Al}_{82}\text{Cu}_{18}||\text{Al}_x\text{MnO}_2$  and Al|| $\text{Al}_x\text{MnO}_2$  cells at different scan rates.

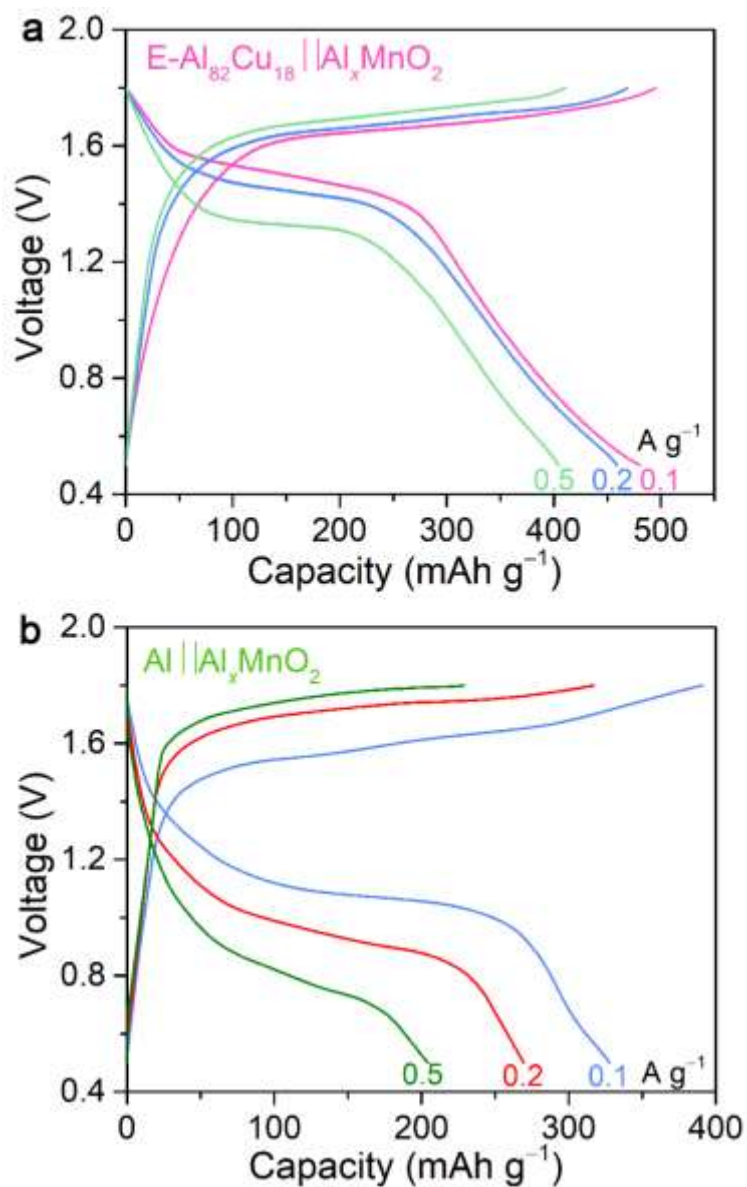

**Supplementary Figure 17. Comparison of voltage profiles of  $E\text{-Al}_{82}\text{Cu}_{18} || \text{Al}_x\text{MnO}_2$  and  $\text{Al} || \text{Al}_x\text{MnO}_2$  cells. a**, Typical voltage profiles of  $E\text{-Al}_{82}\text{Cu}_{18} || \text{Al}_x\text{MnO}_2$  cell at galvanostatic charge/discharge with various specific currents from 0.1 to 0.5  $\text{A g}^{-1}$ . **b**, Typical voltage profiles of  $\text{Al} || \text{Al}_x\text{MnO}_2$  cell at galvanostatic charge/discharge with various specific currents from 0.1 to 0.5  $\text{A g}^{-1}$ .

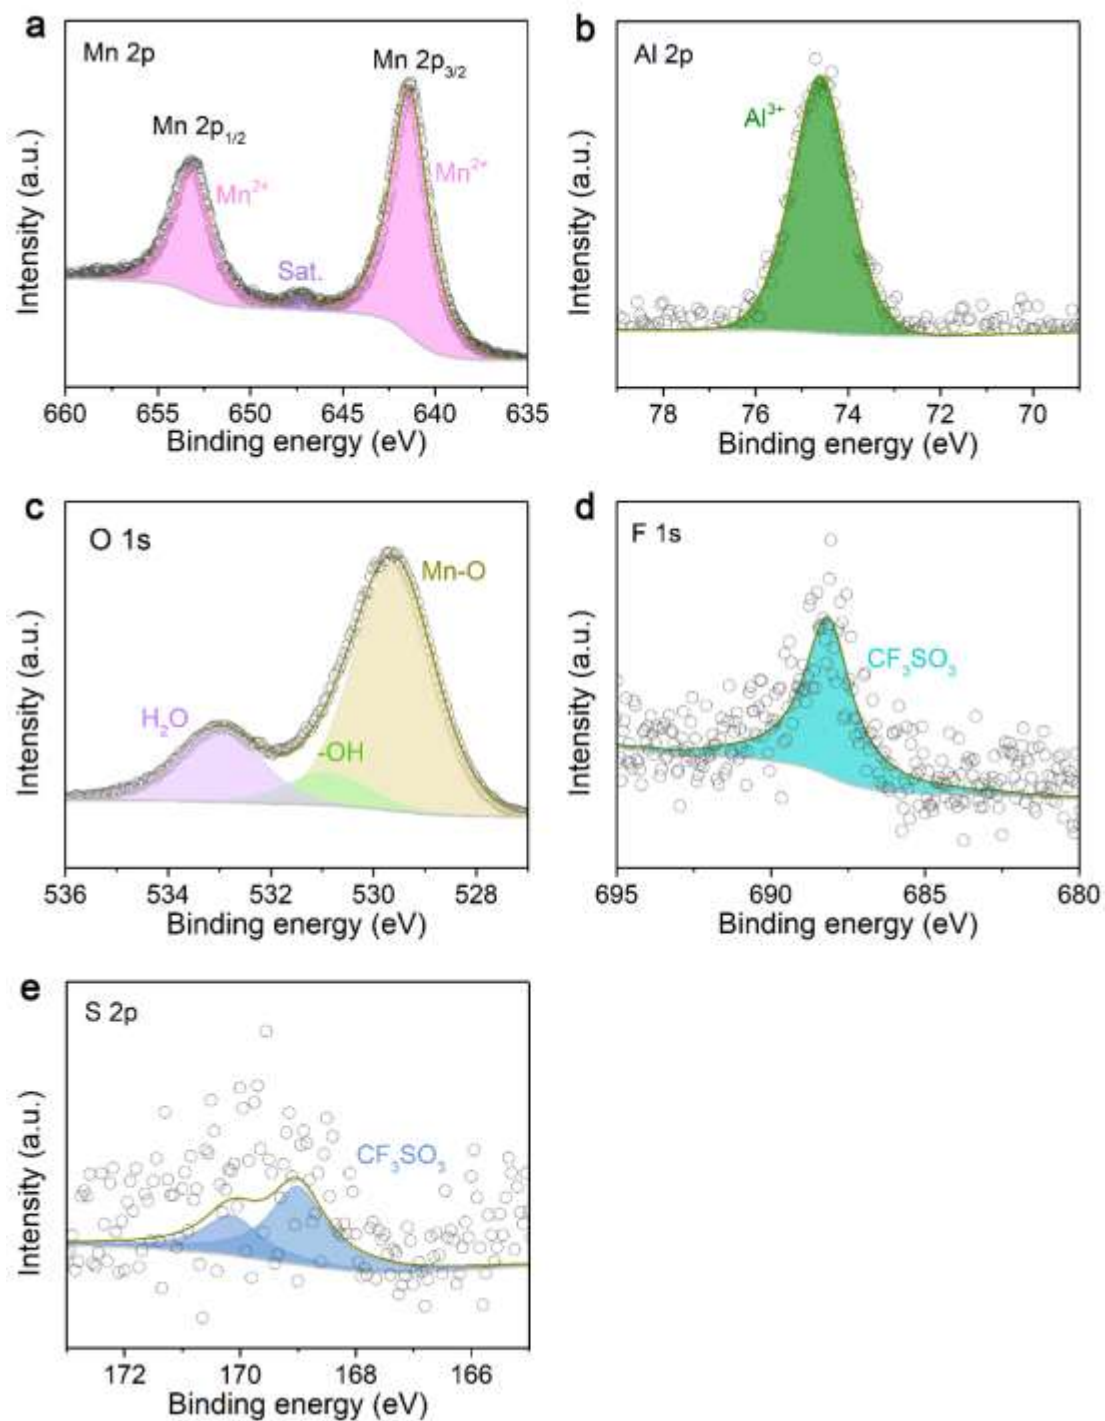

**Supplementary Figure 18. XPS analysis of Al<sub>x</sub>MnO<sub>2</sub> after discharging to 0.5 V. a,** Mn 2p XPS spectrum. **b,** Al 2p XPS spectrum. **c,** O 1s XPS spectrum. **d,** F 1s XPS spectrum. **e,** S 2p XPS spectrum.

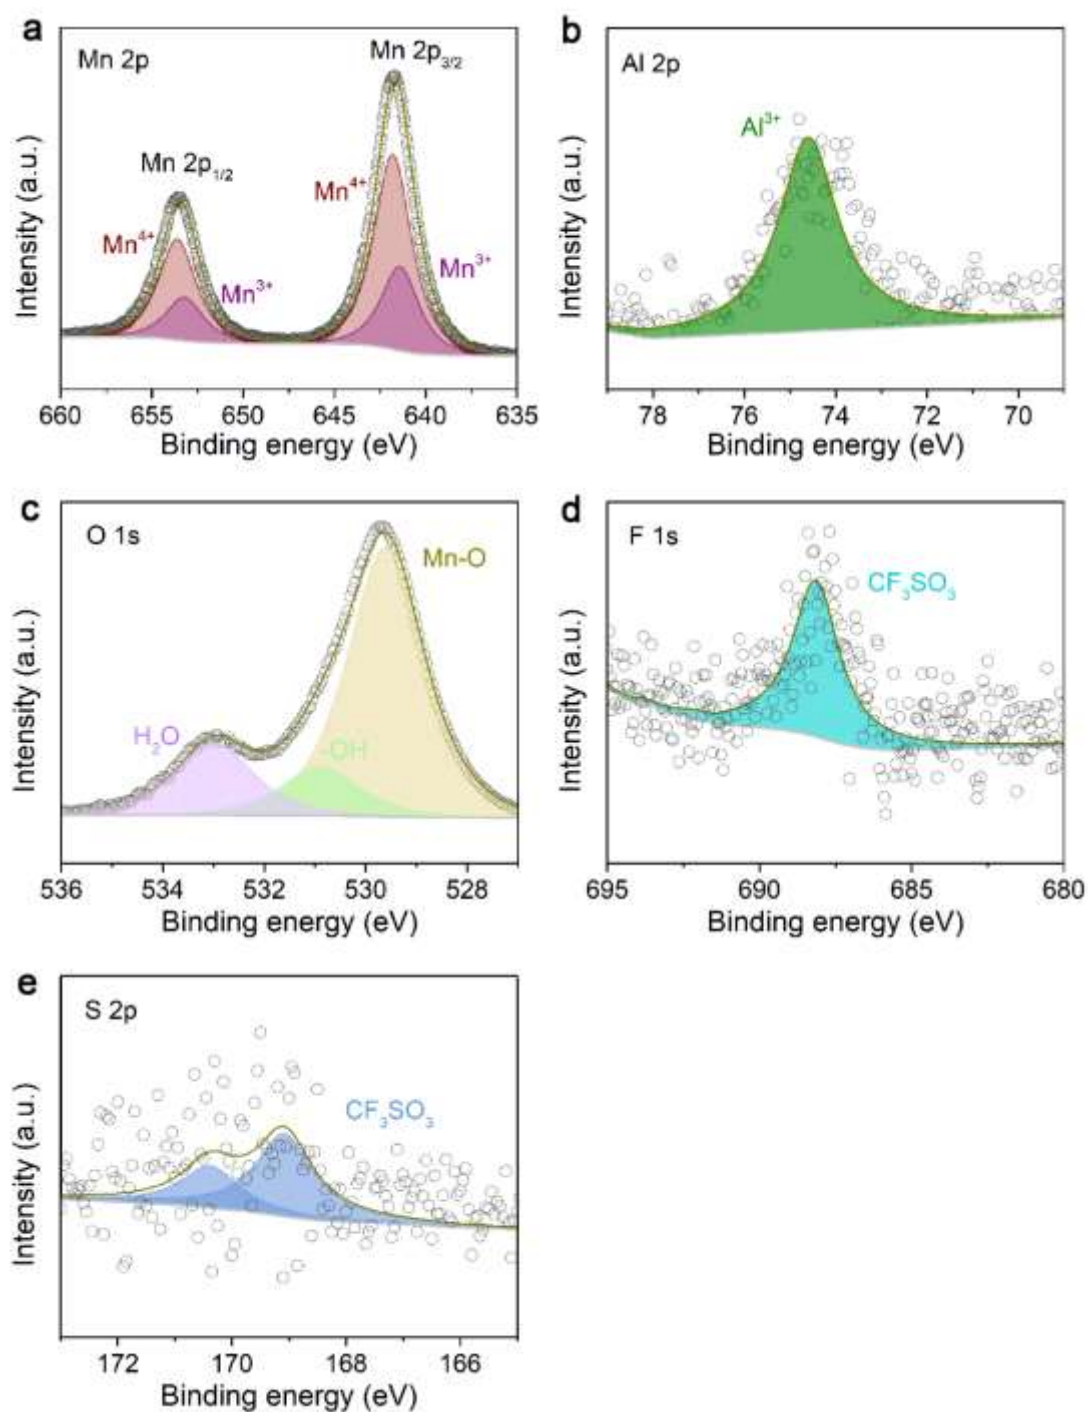

**Supplementary Figure 19. XPS analysis of  $\text{Al}_x\text{MnO}_2$  after charging to 1.8 V. a,** Mn 2p XPS spectrum. **b,** Al 2p XPS spectrum. **c,** O 1s XPS spectrum. **d,** F 1s XPS spectrum. **e,** S 2p XPS spectrum.

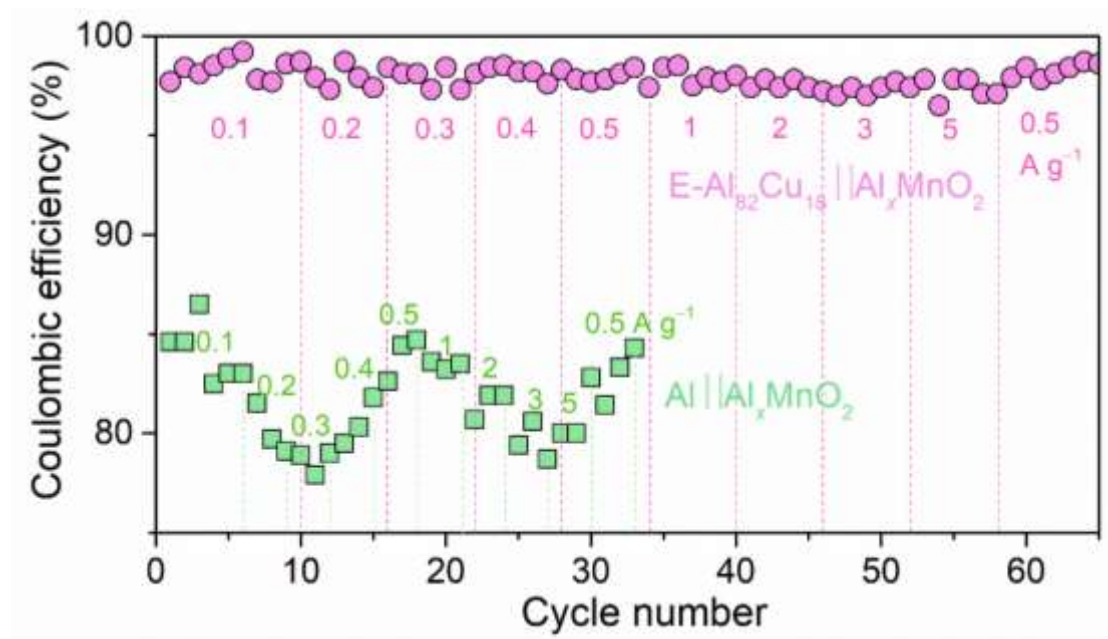

**Supplementary Figure 20.** Comparison of Coulombic efficiency for E-Al<sub>82</sub>Cu<sub>18</sub>||Al<sub>x</sub>MnO<sub>2</sub> and Al||Al<sub>x</sub>MnO<sub>2</sub> cells, which are performed at various specific currents from 0.1 to 5 A g<sup>-1</sup>.

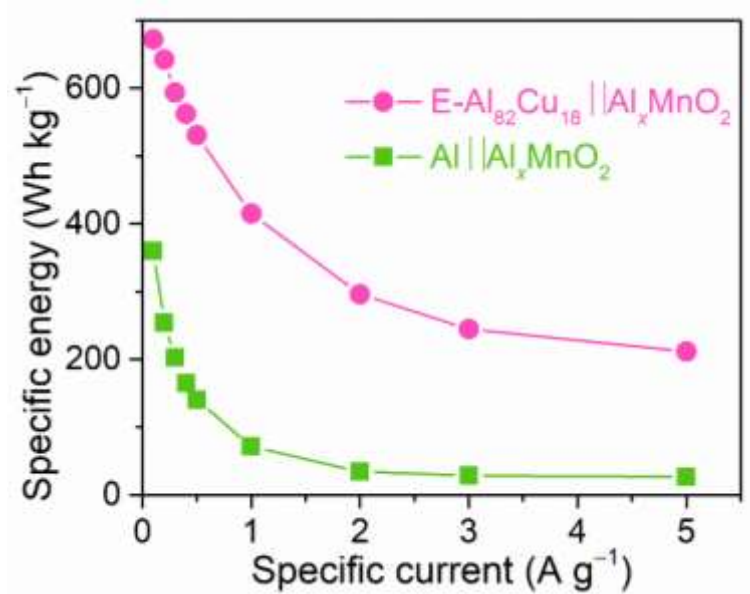

**Supplementary Figure 21.** The specific energy of E-Al<sub>82</sub>Cu<sub>18</sub>||Al<sub>x</sub>MnO<sub>2</sub> and Al||Al<sub>x</sub>MnO<sub>2</sub> full AR-AMB cells at various specific currents from 0.1 to 5 A g<sup>-1</sup>.

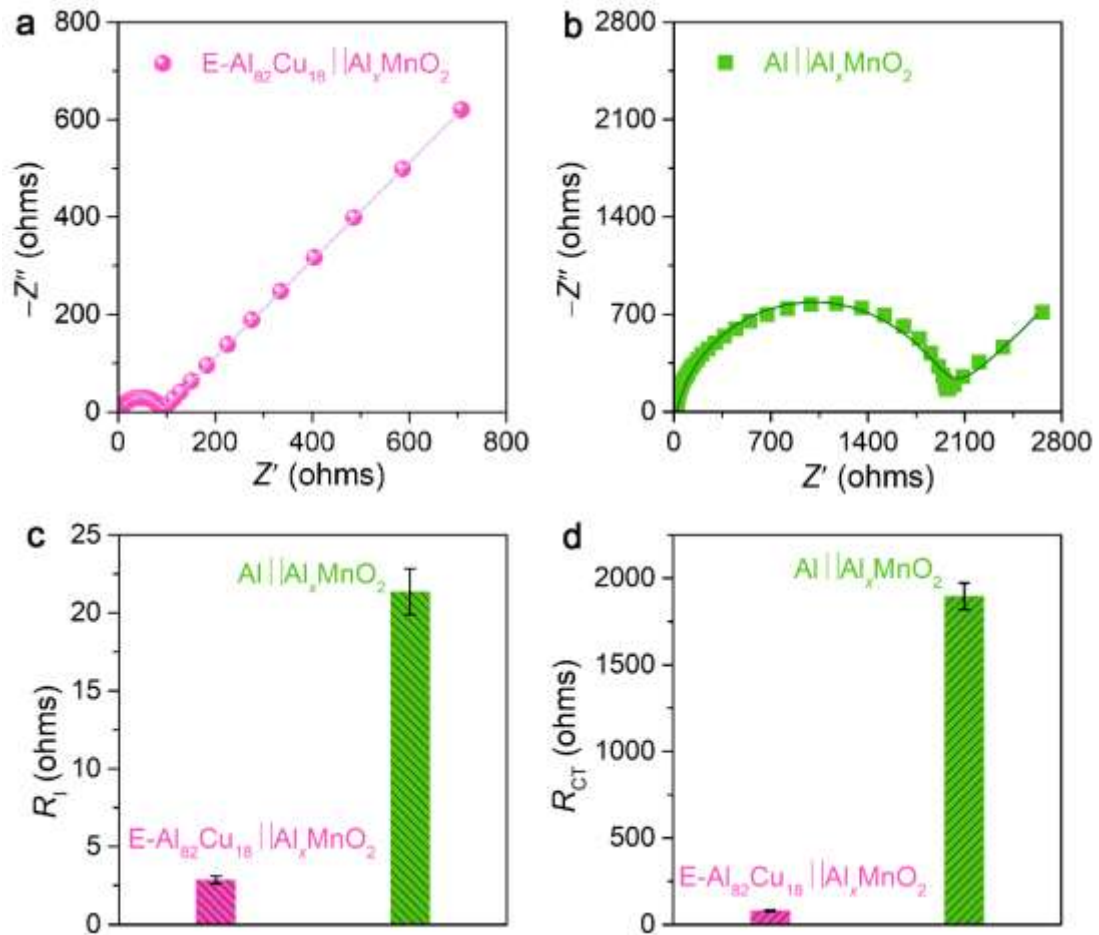

**Supplementary Figure 22. Analysis of EIS spectra for full E-Al<sub>82</sub>Cu<sub>18</sub>||Al<sub>x</sub>MnO<sub>2</sub> and Al||Al<sub>x</sub>MnO<sub>2</sub> cells.** **a**, EIS spectrum for E-Al<sub>82</sub>Cu<sub>18</sub>||Al<sub>x</sub>MnO<sub>2</sub> cell. The pink sphere symbols are the raw data and the light pink line represents the fit data. **b**, EIS spectrum for Al||Al<sub>x</sub>MnO<sub>2</sub> cell. The green square symbols are the raw data and the dark green line represents the fit data. **c**, **d**, Comparisons of the  $R_1$  (**c**) and  $R_{CT}$  (**d**) values of E-Al<sub>82</sub>Cu<sub>18</sub>||Al<sub>x</sub>MnO<sub>2</sub> and Al||Al<sub>x</sub>MnO<sub>2</sub> cells. Therein, both EIS spectra of E-Al<sub>82</sub>Cu<sub>18</sub>||Al<sub>x</sub>MnO<sub>2</sub> and Al||Al<sub>x</sub>MnO<sub>2</sub> cells are analyzed according to the equivalent circuit shown in Supplementary Figure 5d.



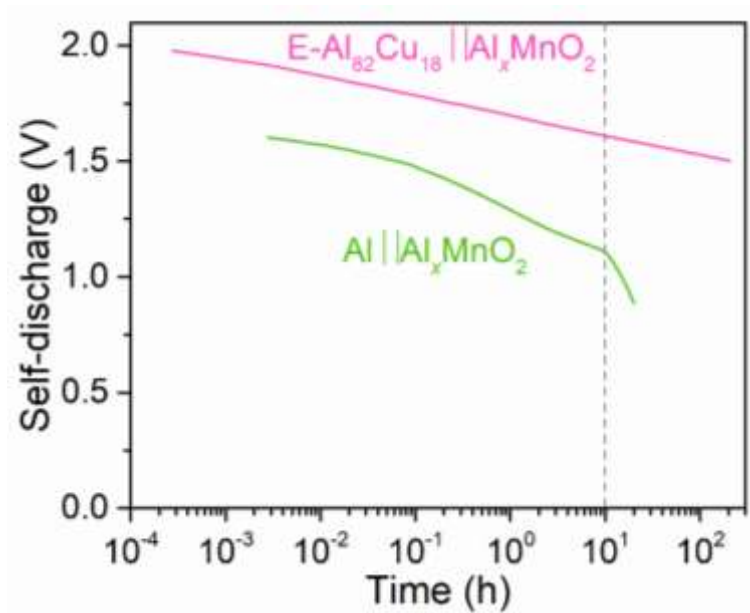

**Supplementary Figure 23.** Self-discharge behaviors of  $E\text{-Al}_{82}\text{Cu}_{18} || \text{Al}_x\text{MnO}_2$  and  $\text{Al} || \text{Al}_x\text{MnO}_2$  full cells.



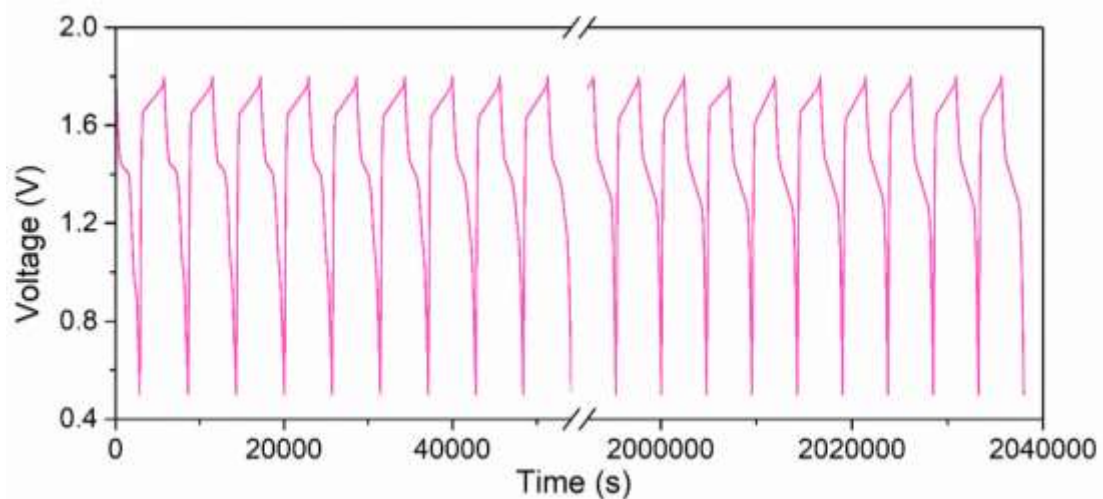

**Supplementary Figure 24.** Voltage profiles during the charge/discharge of E-Al<sub>82</sub>Cu<sub>18</sub>||Al<sub>x</sub>MnO<sub>2</sub> full cell at specific current of 500 mA g<sup>-1</sup>.

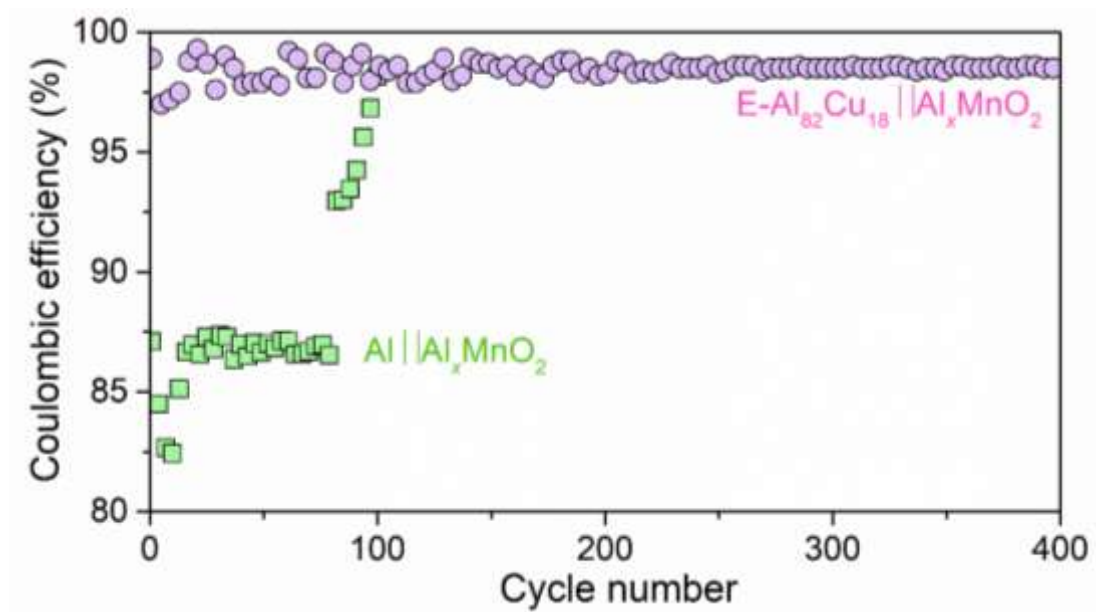

**Supplementary Figure 25.** Coulombic efficiency of E-Al<sub>82</sub>Cu<sub>18</sub>||Al<sub>x</sub>MnO<sub>2</sub> and Al||Al<sub>x</sub>MnO<sub>2</sub> full cells during the charge/discharge at specific current of 500 mA g<sup>-1</sup>.

**Supplementary Table 1.** Abundance, volumetric capacity, gravimetric capacity, charge density of cations and cost for Al, Zn, K, Na and Li. Here the superscript numbers are reference numbers.

|                                                           | <b>Al</b>           | <b>Zn</b>           | <b>K</b>             | <b>Na</b>           | <b>Li</b>            |
|-----------------------------------------------------------|---------------------|---------------------|----------------------|---------------------|----------------------|
| <b>Abundance</b><br>(%)                                   | 8.2 <sup>1</sup>    | 0.0075 <sup>1</sup> | 2.1 <sup>1</sup>     | 2.3 <sup>1</sup>    | 0.0018 <sup>1</sup>  |
| <b>Volumetric capacity</b><br>(mAh cm <sup>-3</sup> )     | 8056 <sup>2,3</sup> | 5851 <sup>2,3</sup> | 591 <sup>2,3</sup>   | 1128 <sup>2,3</sup> | 2062 <sup>2,3</sup>  |
| <b>Gravimetric capacity</b><br>(mAh g <sup>-1</sup> )     | 2981 <sup>2,3</sup> | 820 <sup>2,3</sup>  | 685 <sup>2,3</sup>   | 1166 <sup>2,3</sup> | 3861 <sup>2,3</sup>  |
| <b>Charge density of cations</b><br>(C mm <sup>-3</sup> ) | 364 <sup>4</sup>    | 112 <sup>4</sup>    | 11 <sup>4</sup>      | 24 <sup>4</sup>     | 52 <sup>4</sup>      |
| <b>Cost</b><br>(US\$ T <sup>-1</sup> )                    | 2297 <sup>2,4</sup> | 2789 <sup>2,4</sup> | 18370 <sup>2,4</sup> | 3061 <sup>2,4</sup> | 89557 <sup>2,4</sup> |

**Supplementary Table 2.** O<sub>2</sub> concentrations in 2 M Al(OTF)<sub>3</sub> aqueous electrolytes that are treated by different methods.

| <b>Methods and conditions for electrolyte treatments</b> | <b>O<sub>2</sub> concentrations (C<sub>O<sub>2</sub></sub>, mg L<sup>-1</sup>)</b> |
|----------------------------------------------------------|------------------------------------------------------------------------------------|
| Purging N <sub>2</sub> for 2 h                           | 0.13 ± 0.005                                                                       |
| Purging N <sub>2</sub> for 0.5 h                         | 4.4 ± 0.05                                                                         |
| As-prepared one                                          | 8.9 ± 0.05                                                                         |
| Purging O <sub>2</sub> for 1 h                           | 10.9 ± 0.05                                                                        |
| Purging O <sub>2</sub> for 2 h                           | 13.6 ± 0.05                                                                        |

**Supplementary Table 3.** The  $R_I$  and  $R_{CT}$  values in equivalent circuit models for EIS spectra of E-Al<sub>82</sub>Cu<sub>18</sub>, Al<sub>2</sub>Cu and Al symmetric cells in 2 M Al(OTF)<sub>3</sub> with different O<sub>2</sub> concentrations.

| <b>C<sub>O2</sub></b><br><b>(mg L<sup>-1</sup>)</b> | <b>E-Al<sub>82</sub>Cu<sub>18</sub></b>       |                                                  | <b>Al<sub>2</sub>Cu</b>                       |                                                  | <b>Al</b>                                     |                                                  |
|-----------------------------------------------------|-----------------------------------------------|--------------------------------------------------|-----------------------------------------------|--------------------------------------------------|-----------------------------------------------|--------------------------------------------------|
|                                                     | <b><math>R_I</math> (<math>\Omega</math>)</b> | <b><math>R_{CT}</math> (<math>\Omega</math>)</b> | <b><math>R_I</math> (<math>\Omega</math>)</b> | <b><math>R_{CT}</math> (<math>\Omega</math>)</b> | <b><math>R_I</math> (<math>\Omega</math>)</b> | <b><math>R_{CT}</math> (<math>\Omega</math>)</b> |
| <b>0.13</b>                                         | 3.24 ± 0.24                                   | 161 ± 8                                          | 7.40 ± 0.63                                   | 292 ± 12                                         | 30.7 ± 2.0                                    | 3880 ± 135                                       |
| <b>4.4</b>                                          | 6.52 ± 0.59                                   | 299 ± 14                                         | 8.85 ± 0.75                                   | 419 ± 18                                         | 47.3 ± 3.9                                    | 7367 ± 289                                       |
| <b>8.9</b>                                          | 9.70 ± 0.67                                   | 442 ± 16                                         | 9.68 ± 0.73                                   | 522 ± 24                                         | 43.5 ± 2.4                                    | 10530 ± 347                                      |
| <b>10.9</b>                                         | 10.5 ± 0.8                                    | 461 ± 18                                         | 10.5 ± 0.7                                    | 568 ± 28                                         | 70.2 ± 5.9                                    | 11530 ± 466                                      |
| <b>13.6</b>                                         | 11.9 ± 1.1                                    | 517 ± 19                                         | 11.7 ± 0.7                                    | 687 ± 21                                         | 85.8 ± 6.3                                    | 13330 ± 478                                      |

**Supplementary Table 4.** The  $R_I$  and  $R_{CT}$  values in equivalent circuit models for EIS spectra of E-Al<sub>82</sub>Cu<sub>18</sub>, Al<sub>2</sub>Cu and Al symmetric cells in 2 M Al(OTF)<sub>3</sub> with C<sub>O<sub>2</sub></sub> = 0.13 mg L<sup>-1</sup> before and after Al stripping/plating for 240 or 24 h, respectively.

|              | E-Al <sub>82</sub> Cu <sub>18</sub> |                       | Al <sub>2</sub> Cu |                       | Al                 |                       |
|--------------|-------------------------------------|-----------------------|--------------------|-----------------------|--------------------|-----------------------|
|              | $R_I$ ( $\Omega$ )                  | $R_{CT}$ ( $\Omega$ ) | $R_I$ ( $\Omega$ ) | $R_{CT}$ ( $\Omega$ ) | $R_I$ ( $\Omega$ ) | $R_{CT}$ ( $\Omega$ ) |
| <b>0 h</b>   | 3.24 ± 0.24                         | 161 ± 8               | 7.40 ± 0.63        | 292 ± 12              | 30.7 ± 2.0         | 3881 ± 135            |
| <b>240 h</b> | 5.11 ± 0.36                         | 181 ± 9               | 15.1 ± 1.39        | 582 ± 21              |                    |                       |
| <b>24 h</b>  |                                     |                       |                    |                       | 36.1 ± 2.6         | 8855 ± 410            |

**Supplementary Table 5.** The ICP analysis of the as-prepared  $\text{Al}_x\text{MnO}_2 \cdot n\text{H}_2\text{O}$ .

| <b><math>\text{Al}_{0.12}\text{MnO}_2</math></b> | <b>Al</b>               | <b>Mn</b>             |
|--------------------------------------------------|-------------------------|-----------------------|
| Molar concentration<br>(mmol/L)                  | $0.000771 \pm 0.000001$ | $0.00632 \pm 0.00001$ |
| Atomic ratio<br>(%)                              | $10.87 \pm 0.03$        | $89.13 \pm 0.03$      |

**Supplementary Table 6.** Comparison of E-Al<sub>82</sub>Cu<sub>18</sub>||Al<sub>x</sub>MnO<sub>2</sub> full cells with representative LIBs.

| Anode/Cathode                                                                      | Electrolyte                                        | Battery type                 | Specific energy<br>(Wh kg <sup>-1</sup> ) | Average discharge<br>capacity<br>(mAh g <sup>-1</sup> ) | Ref.      |
|------------------------------------------------------------------------------------|----------------------------------------------------|------------------------------|-------------------------------------------|---------------------------------------------------------|-----------|
| Li  LiNi <sub>0.6</sub> Mn <sub>0.2</sub> Co <sub>0.2</sub> O <sub>2</sub>         | LiFSI-DME-TTE                                      | Nonaqueous<br>Li-ion battery | 667                                       | 185                                                     | 5         |
| Sn-DGT  NCM622                                                                     | LiPF <sub>6</sub>                                  | Nonaqueous<br>Li-ion battery | 590                                       | 850                                                     | 6         |
| Li  NMC811                                                                         | LiFSI-DMTMSA                                       | Nonaqueous<br>Li-ion battery | 758                                       | 205                                                     | 7         |
| Li <sub>4</sub> Ti <sub>5</sub> O <sub>12</sub>   LiMn <sub>2</sub> O <sub>4</sub> | LiN(SO <sub>2</sub> CF <sub>3</sub> ) <sub>2</sub> | Aqueous<br>Li-ion battery    | 331                                       | 135                                                     | 8         |
| E-Al <sub>82</sub> Cu <sub>18</sub>   Al <sub>x</sub> MnO <sub>2</sub>             | Al(OTF) <sub>3</sub> -H <sub>2</sub> O             | Aqueous<br>Al-ion battery    | 672                                       | 470                                                     | This work |



**Supplementary Table 7.** The  $R_1$  and  $R_{CT}$  values in equivalent circuit models for EIS spectra of E- $\text{Al}_{82}\text{Cu}_{18}\|\text{Al}_x\text{MnO}_2$  and  $\text{Al}\|\text{Al}_x\text{MnO}_2$  AR-AMB cells.

| <b>E-<math>\text{Al}_{82}\text{Cu}_{18}\ \text{Al}_x\text{MnO}_2</math></b> |                                                  | <b>Al/<math>\text{Al}_x\text{MnO}_2</math></b> |                                                  |
|-----------------------------------------------------------------------------|--------------------------------------------------|------------------------------------------------|--------------------------------------------------|
| <b><math>R_1</math> (<math>\Omega</math>)</b>                               | <b><math>R_{CT}</math> (<math>\Omega</math>)</b> | <b><math>R_1</math> (<math>\Omega</math>)</b>  | <b><math>R_{CT}</math> (<math>\Omega</math>)</b> |
| $2.84 \pm 0.24$                                                             | $86.0 \pm 4.2$                                   | $20.4 \pm 1.5$                                 | $1922 \pm 78$                                    |

**Supplementary Table 8.** Comparison of aqueous and non-aqueous secondary AIBs.

| Anode/Cathode                        | Electrolyte (mL)                    | Battery type              | Specific Current (A g <sup>-1</sup> ) | Cycles ( <i>n</i> ) | Capacity retention (%) | Coulombic efficiency (%) | Cell-level capacity (mAh g <sup>-1</sup> ) | Cell-level specific energy (Wh kg <sup>-1</sup> ) | Average discharge capacity (mAh g <sup>-1</sup> ) | Average discharge potential (V) | Ref. |
|--------------------------------------|-------------------------------------|---------------------------|---------------------------------------|---------------------|------------------------|--------------------------|--------------------------------------------|---------------------------------------------------|---------------------------------------------------|---------------------------------|------|
| Al  graphite                         | AlCl <sub>3</sub> -[EMIm]Cl<br>1.5  | Non-aqueous pouch-type    | 4                                     | 7500                | 100                    | 98                       | 19                                         | 27                                                | 65                                                | 1.42                            | 9    |
| Al  carbon paper                     | AlCl <sub>3</sub> -[EMIm]Cl<br>10   | Non-aqueous teflon tank   | 0.1                                   | 100                 | 100                    | 100                      | 20                                         | 28                                                | 70                                                | 1.4                             | 10   |
| Al  natural graphite                 | AlCl <sub>3</sub> -[EMIm]Cl<br>n/a  | Non-aqueous pouch-type    | 20                                    | 250000              | 70                     | 99                       | 21                                         | 29                                                | 96                                                | 1.38                            | 11   |
| Al  natural graphite                 | AlCl <sub>3</sub> -[EMIm]Cl<br>n/a  | Non-aqueous Swagelok-type | 0.1                                   | 100                 | 100                    | 90                       | 21                                         | 30                                                | 124                                               | 1.43                            | 12   |
| Al  graphene                         | AlCl <sub>3</sub> -[EMIm]Cl<br>0.05 | Non-aqueous coin type     | 5                                     | 25000               | 97                     | 98                       | 22                                         | 31                                                | 97                                                | 1.41                            | 13   |
| Al  natural graphite flakes          | AlCl <sub>3</sub> -[EMIm]Cl<br>2    | Non-aqueous pouch-type    | 0.66                                  | 6000                | 100                    | 99.5                     | 23                                         | 32                                                | 60                                                | 1.39                            | 14   |
| Al  graphene film                    | AlCl <sub>3</sub> -[EMIm]Cl<br>0.2  | Non-aqueous coin-type     | 100                                   | 250000              | 100                    | 98                       | 23                                         | 32                                                | 120                                               | 1.39                            | 15   |
| Al  3D graphene                      | AlCl <sub>3</sub> -[EMIm]Cl<br>n/a  | Non-aqueous pouch-type    | 5                                     | 10000               | 100                    | 98                       | 23                                         | 33                                                | 123                                               | 1.43                            | 16   |
| Al  PQ-triangle with graphite flakes | AlCl <sub>3</sub> -[EMIm]Cl<br>n/a  | Non-aqueous Swagelok-type | 2                                     | 2000                | 50                     | 99                       | 35                                         | 50                                                | 84                                                | 1.43                            | 17   |
| Al  V <sub>2</sub> CT <sub>x</sub>   | AlCl <sub>3</sub> -[EMIm]Cl<br>n/a  | Non-aqueous pouch-type    | 0.2                                   | 100                 | 56                     | 96                       | 39                                         | 47                                                | 110                                               | 1.21                            | 18   |

|                                                                        |                                                                    |                           |       |      |     |     |      |      |     |      |              |
|------------------------------------------------------------------------|--------------------------------------------------------------------|---------------------------|-------|------|-----|-----|------|------|-----|------|--------------|
| <b>Al  VO<sub>2</sub></b>                                              | AlCl <sub>3</sub> -[EMIm]Cl<br>n/a                                 | Non-aqueous<br>coin type  | 0.05  | 100  | 73  | 99  | 43   | 26   | 125 | 0.6  | 19           |
| <b>Al  V<sub>2</sub>O<sub>5</sub></b>                                  | AlCl <sub>3</sub> -[EMIm]Cl<br>n/a                                 | Non-aqueous<br>coin type  | 0.125 | 20   | 89  | 99  | 58   | 35   | 270 | 0.6  | 20           |
| <b>Al  MoS<sub>2</sub>-carbon<br/>nanofibres</b>                       | AlCl <sub>3</sub> -[EMIm]Cl<br>n/a                                 | Non-aqueous<br>pouch-type | 0.1   | 200  | 43  | 95  | 47   | 47   | 155 | 1    | 21           |
| <b>Al  Co<sub>3</sub>S<sub>4</sub></b>                                 | AlCl <sub>3</sub> -[EMIm]Cl<br>0.05                                | Non-aqueous<br>coin type  | 0.05  | 150  | 100 | 100 | 36   | 29   | 90  | 0.81 | 22           |
| <b>Al  Co<sub>9</sub>S<sub>8</sub><br/>@CNT-CNF</b>                    | AlCl <sub>3</sub> -[EMIm]Cl<br>0.035                               | Non-aqueous<br>pouch-type | 1     | 6000 | 56  | 96  | 45   | 45   | 100 | 1    | 23           |
| <b>Al  Ni<sub>3</sub>S<sub>2</sub></b>                                 | AlCl <sub>3</sub> -[EMIm]Cl<br>n/a                                 | Non-aqueous<br>pouch-type | 0.01  | 100  | 17  | 100 | 28   | 22   | 50  | 0.79 | 24           |
| <b>Al  graphite</b>                                                    | LiPF <sub>6</sub> , AlF <sub>3</sub> EMC<br>-DMC, VC<br>n/a        | Non-aqueous<br>pouch-type | 0.1   | 600  | 98  | 99  | 26   | 92   | 100 | 3.54 | 25           |
| <b>Al  graphite</b>                                                    | AlCl <sub>3</sub> -6H <sub>2</sub> O<br>n/a                        | Aqueous coin<br>type      | 0.5   | 1000 | 100 | 95  | 55   | 79   | 165 | 1.44 | 26           |
| <b>Al  Al<sub>x</sub>MnO<sub>2</sub>·nH<sub>2</sub>O</b>               | Al(OTF) <sub>3</sub> -H <sub>2</sub> O<br>n/a                      | Aqueous coin<br>type      | 0.03  | 20   | 58  | 85  | 42   | 46   | 409 | 1.1  | 27           |
| <b>IL-treated<br/>Al  α-MnO<sub>2</sub></b>                            | Al(OTF) <sub>3</sub> -H <sub>2</sub> O<br>n/a                      | Aqueous coin<br>type      | 0.1   | 40   | 44  | 100 | 41   | 54   | 250 | 1.32 | 28           |
| <b>IL-treated<br/>Al  Birnessite-MnO<sub>2</sub></b>                   | Al(OTF) <sub>3</sub> -H <sub>2</sub> O<br>MnSO <sub>4</sub><br>n/a | Aqueous coin<br>type      | 0.1   | 25   | 58  | 99  | 33   | 37   | 470 | 1.12 | 29           |
| <b>E-Al<sub>82</sub>Cu<sub>18</sub>  Al<sub>x</sub>MnO<sub>2</sub></b> | Al(OTF) <sub>3</sub> -H <sub>2</sub> O<br>0.25                     | Aqueous coin<br>type      | 0.2   | 200  | 82  | 99  | 66.7 | 90.2 | 470 | 1.35 | This<br>work |

## Supplementary References

1. <https://environmentalchemistry.com/yogi/periodic/>.
2. Zhang, Y., Liu, S., Ji, Y., Ma, J. & Yu, H. Emerging nonaqueous aluminum-ion batteries: challenges, status, and perspectives. *Adv. Mater.* **30**, 1706310 (2018).
3. Liang, Y., Dong, H., Aurbach, D. & Yao, Y. Current status and future directions of multivalent metal-ion batteries. *Nat Energy* **5**, 646-656 (2020).
4. Faegh, E., Ng, B., Hayman, D. & Mustain, W. Practical assessment of the performance of aluminum battery technologies. *Nat. Energy* **6**, 21-29 (2021).
5. Niu, C., Liu, D., Lochala, J.A., Anderson, C.S., Cao, X., Gross, M.E., Xu, w., Zhang, J.G., Whittingham, M.S., Xiao, J. & Liu, J. Balancing interfacial reactions to achieve long cycle life in high-energy lithium metal batteries. *Nat Energy* **6**, 723–732 (2021).
6. Mo, R., Tan, X., Li, F., Tao, R., Xu, J., Kong, D., Wang, Z., Xu, B., Wang, X., Wang, C., Li, j., Peng, Y. & Lu, Y. Tin-graphene tubes as anodes for lithium-ion batteries with high volumetric and gravimetric energy densities. *Nat Commun* **11**, 1374 (2020).
7. Xue, W., Huang, M., Li, Y. Zhu, Y., Gao, R., Xiao, X., Zhang, W., Li, S., Xu, G., Yu, Y., Li, P., Lopez, J., Yu, D., Dong, Y., Fan, W., Shi, Z., Xiong, R., Sun, C., Hwang, I., Lee, W., Horn, Y., Johnson, J.A. & Li, J. Ultra-high-voltage Ni-rich layered cathodes in practical Li metal batteries enabled by a sulfonamide-based electrolyte. *Nat Energy* **6**, 495–505 (2021).
8. Shang, Y., Chen, N., Li, Y., Chen, S., Lai, J., Huang, Y., Qu, W., Wu, F. & Chen, R. An “Ether-In-Water” Electrolyte Boosts Stable Interfacial Chemistry for Aqueous Lithium-Ion Batteries. *Adv. Mater.* **32**, 2004017 (2020).
9. Lin, M.C., Gong, M., Lu, B., Wu, Y., Wang, D.Y., Guan, M., Angell, M., Chen, C., Yang, J., Hwang, B.J. & Dai, H. An ultrafast rechargeable aluminium-ion battery. *Nature* **520**, 324-328 (2015).
10. Sun, H., Wang, W., Yu, Z., Yuan, Y., Wang, S. & Jiao, S. A new aluminium-ion battery with high voltage, high safety and low cost. *Chem. Commun.* **51**, 11892-11895 (2015).
11. Elia, G.A., Kyeremateng, N.A., Marquardt, K. & Hahn, R. An aluminum/graphite battery with ultra-high rate capability. *Batter. Supercaps.* **2**, 83-90 (2019).
12. Kravchyk, K.V., Wang, S., Piveteau, L. & Kovalenko, M.V. Efficient aluminum chloride–natural graphite battery. *Chem. Mater.* **29**, 4484-4492 (2017).
13. Chen, H., Guo, F., Liu, Y., Huang, T., Zheng, B., Ananth, N., Xu, Z., Gao, W. & Gao, C. A defect-free principle for advanced graphene cathode of aluminum-ion battery. *Adv. Mater.* **29**, 1605958 (2017).
14. Wang, D.Y., Wei, C.H., Lin, M.C., Pan, C.J., Chou, H.L., Chen, H.A., Gong, M.,

- Wu, Y., Yuan, C., Angell, M., Hsieh, Y.-J., Chen, Y.H., Wen, C.Y., Chen, C.W., Hwang, B.J., Chen, C.C. & Dai, H. Advanced rechargeable aluminum ion battery with a high-quality natural graphite cathode. *Nat. Commun.* **8**, 14283 (2017).
15. Chen, H., Xu, H., Wang, S., Huang, T., Xi, J., Cai, S., Guo, F., Xu, Z., Gao, W. & Gao, C. Ultrafast all-climate aluminum-graphene battery with quarter-million cycle life. *Sci. Adv.* **3**, eaao7233 (2017).
  16. Yu, X., Wang, B., Gong, D., Xu, Z. & Lu, B. Graphene nanoribbons on highly porous 3D graphene for high-capacity and ultrastable Al-ion batteries. *Adv. Mater.* **29**, 1604118 (2017).
  17. Kim, D. J., Yoo, D.J., Otley, M.T., Prokofjevs, A., Pezzato, C., Owczarek, M., Lee, S.J., Choi, J.W. & Stoddart, F. Rechargeable aluminium organic batteries. *Nat. Energy* **4**, 51 (2019).
  18. VahidMohammadi, A., Hadjikhani, A., Shahbazmohamadi, S. & Beidaghi, M. Two-dimensional vanadium carbide (MXene) as a high-capacity cathode material for rechargeable aluminum batteries. *ACS Nano* **11**, 11135-11144 (2017).
  19. Wang, W., Jiang, B., Xiong, W., Sun, H., Lin, Z., Hu, L., Tu, J., Hou, J., Zhu, H. & Jiao, S. A new cathode material for super-valent battery based on aluminium ion intercalation and deintercalation. *Sci. Rep.* **3**, 3383 (2013).
  20. Jayaprakash, N., Das, S. & Archer, L. The rechargeable aluminum-ion battery. *Chem. Commun.* **47**, 12610–12612 (2011).
  21. Yang, W., Lu, H., Cao, Y., Xu, B., Deng, Y. & Cai, W. Flexible free-standing MoS<sub>2</sub>/carbon nanofibers composite cathode for rechargeable aluminum-ion batteries. *ACS Sustain. Chem. Eng.* **7**, 4861-4867 (2019).
  22. Li, H., Yang, H., Sun, Z., Shi, Y., Cheng, H. & Li, F. A highly reversible Co<sub>3</sub>S<sub>4</sub> microsphere cathode material for aluminum-ion batteries. *Nano Energy* **56**, 100-108 (2019).
  23. Hu, Y., Ye, D., Luo, B., Hu, H., Zhu, X., Wang, S., Li, L., Peng, S. & Wang, L. A binder-free and free-standing cobalt sulfide@carbon nanotube cathode material for aluminum-ion batteries. *Adv. Mater.* **30**, 1703824 (2018).
  24. Wang, S., Yu, Z., Tu, J., Wang, J., Tian, D., Liu, Y. & Jiao, S., A novel aluminum-ion battery: Al/AlCl<sub>3</sub>-[EMIM]Cl/Ni<sub>3</sub>S<sub>2</sub>@graphene. *Adv. Energy Mater.* **6**, 1600137 (2016).
  25. Wang, S., Jiao, S., Tian, D., Chen, H., Jiao, H., Tu, J., Liu, Y. & Fang, D. A novel ultrafast rechargeable multi-ions battery. *Adv. Mater.* **29**, 1606349 (2017).
  26. Pan, W., Wang, Y., Zhang, Y., Kwok, H., Wu, M., Zhao, X. & Leung, D.Y.C. A low-cost and dendrite-free rechargeable aluminium-ion battery with superior performance. *J. Mater. Chem. A* **7**, 17420–17425 (2019).
  27. Wu, C., Gu, S., Zhang, Q., Bai, Y., Li, M., Yuan, Y., Wang, H., Liu, X., Yuan, Y., Zhu, N., Wu, F., Li, H., Gu, L. & Lu, J. Electrochemically activated spinel

- manganese oxide for rechargeable aqueous aluminum battery. *Nat. Commun.* **10**, 73 (2019).
28. Zhao, Q., Zachman, M.J., Al Sadat, W., Zheng, J., Kourkoutis, L.F. & Archer, L. Solid electrolyte interphases for high-energy aqueous aluminum electrochemical cells. *Sci. Adv.* **4**, eaau8131 (2018).
29. He, S., Wang, J., Zhang, X., Chen, J., Wang, Z., Yang, T., Liu, Z., Liang, Y., Wang, B., Liu, S., Zhang, L., Huang, J., Huang, J., O'Dell, L.A. & Yu, H. A high-energy aqueous aluminum-manganese battery. *Adv. Funct. Mater.* **29**, 1905228 (2019).
